# Supplementary material for: Principal-Oscillation-Pattern Analysis of Gene Expression
Source: PLoS One. 2012 Jan 10;7(1):e28805. doi: 10.1371/journal.pone.0028805 (PMC3254616; doi:10.1371/journal.pone.0028805)
Supplement: Table S4 — ‘Cell cycle’ genes identified by POP, experiment, MIPS and existing computational methods. (XLS) [file pone.0028805.s008.xls]

## Sheet: Sheet1
Table S4. ''cell cycle' genes identified by POP, experiment, MIPS and existing computational methods
POP (amp>0.1)	Experiment	MIPS	Spellman	Zhao	Johansson (Top 800)	Lu	Luan	de Lichtenberg (Top 800)
YER0871C	YAL040C	YAL009W	YKL164C	YPL127C	YPL163C	YAR007C	YJL159W	YPL163C
YML021W	YAR007C	YAL016W	YBR054W	YNL126W	YBR009C	YAR018C	YLR274W	YNL030W
YNL227C	YAR018C	YAL020C	YNL327W	YGL225W	YNL030W	YAR071W	YKL163W	YDR225W
YLR074C	YBL002W	YAL021C	YKL163W	YBR088C	YDR225W	YBL002W	YPL061W	YER001W
YLR078C	YBL003C	YAL024C	YKL185W	YKR077W	YPL256C	YBL003C	YDL093W	YDR224C
YLR094C	YBL035C	YAL025C	YDR033W	YDR113C	YBL002W	YBL035C	YLL032C	YNL031C
YLR452C	YBR009C	YAL029C	YLR286C	YBL002W	YBL003C	YBL111C	YOR153W	YNL300W
YOR046C	YBR010W	YAL034W-A	YMR032W	YKR010C	YBR010W	YBL113C	YDR224C	YBR010W
YLR098C	YBR023C	YAL040C	YPL256C	YNL030W	YER001W	YBR009C	YML034W	YBR009C
YLR100W	YBR054W	YAL041W	YJL159W	YIL129C	YBR088C	YBR010W	YDR225W	YBL003C
YOR054C	YBR067C	YAL047C	YGL028C	YDR224C	YGR109C	YBR038W	YHR005C	YBR088C
YLR462W	YBR083W	YAR007C	YBR092C	YPR135W	YNL327W	YBR054W	YNL030W	YPL127C
YOR056C	YBR088C	YAR018C	YDR225W	YOL007C	YDR224C	YBR071W	YMR215W	YPL256C
YML012W	YBR202W	YAR019C	YLR190W	YLR383W	YKL164C	YBR073W	YLR455W	YGR189C
YOR074C	YBR278W	YBL008W	YOL007C	YCL024W	YKL163W	YBR086C	YOR074C	YOR247W
YOR102W	YCL027W	YBL009W	YDR224C	YOR247W	YNL031C	YBR088C	YIL123W	YOL007C
YOR104W	YCL055W	YBL016W	YIL072W	YER032W	YNL145W	YBR089W	YPR156C	YBL002W
YNL191W	YDL003W	YBL020W	YBL003C	YIL123W	YBR040W	YBR092C	YML033W	YIL066C
YML093W	YDL055C	YBL051C	YLR183C	YPL153C	YPR119W	YBR158W	YBR009C	YNR009W
YNL233W	YDL102W	YBL058W	YBR088C	YMR215W	YOR247W	YBR202W	YNL031C	YOR248W
YLR131C	YDL127W	YBL061C	YPR119W	YKL113C	YMR199W	YCL012W	YLR273C	YGR109C
YLR464W	YDL155W	YBL063W	YHL028W	YGR109C	YNR044W	YCL014W	YGL021W	YER070W
YOR058C	YDL164C	YBL071W-A	YMR001C	YNR009W	YOL007C	YCL022C	YNL231C	YOR074C
YLR110C	YDL179W	YBL079W	YKR013W	YNL031C	YGL032C	YCL024W	YPL256C	YIL140W
YLR112W	YDL197C	YBL084C	YNL030W	YBR010W	YMR215W	YCL060C	YBL003C	YMR307W
YOR066W	YDL227C	YBL088C	YIL140W	YER111C	YKR013W	YCR024C-A	YGR092W	YER111C
YOR084W	YDR033W	YBL097W	YDL003W	YAL007C	YJL159W	YDL003W	YKR013W	YLR274W
YLR136C	YDR052C	YBL105C	YBR038W	YEL042W	YER070W	YDL010W	YDL095W	YJL159W
YML034W	YDR077W	YBR017C	YBR202W	YAR007C	YGR189C	YDL018C	YPL141C	YMR179W
YLR154C	YDR097C	YBR023C	YBR010W	YDR225W	YLR183C	YDL055C	YJL115W	YDL003W
YLR160C	YDR113C	YBR038W	YNL058C	YDL164C	YDL003W	YDL101C	YMR258C	YLR183C
YML065W	YDR146C	YBR045C	YNL160W	YLR274W	YJL170C	YDL103C	YAR007C	YMR215W
YNL200C	YDR150W	YBR057C	YHR143W	YLR103C	YPL127C	YDL117W	YDL164C	YDL164C
YNL208W	YDR224C	YBR073W	YBR089W	YOR248W	YPR156C	YDL127W	YER032W	YMR199W
YLR079W	YDR225W	YBR078W	YPR149W	YDL156W	YNL300W	YDL138W	YEL017W	YPL153C
YLR455W	YDR309C	YBR079C	YDR097C	YIL066C	YML027W	YDL164C	YOR066W	YHR005C
YLR459W	YDR356W	YBR087W	YGR108W	YBR242W	YIL066C	YDR033W	YOR246C	YIL141W
YLR463C	YER001W	YBR103W	YLR049C	YKL045W	YNL058C	YDR089W	YMR001C	YNL145W
YOR073W	YER011W	YBR107C	YNR067C	YGR152C	YKL185W	YDR097C	YBR088C	YKL113C
YOR099W	YER070W	YBR109C	YPL127C	YLL002W	YKR012C	YDR113C	YOL007C	YER095W
YOR103C	YER095W	YBR133C	YBL002W	YNL068C	YOR248W	YDR146C	YDR074W	YBR071W
YNL160W	YER111C	YBR135W	YOR025W	YBR089W	YCRX18C	YDR183W	YJL044C	YDR097C
YNL190W	YER124C	YBR136W	YAR007C	YNL082W	YER111C	YDR191W	YJR092W	YML027W
YOR135C	YFL026W	YBR156C	YML119W	YJL074C	YMR001C	YDR224C	YGR138C	YJL074C
YNL192W	YFR028C	YBR158W	YGR189C	YPL163C	YMR011W	YDR225W	YOL012C	YOR066W
YNL220W	YGL028C	YBR160W	YCL024W	YOL090W	YGL021W	YDR503C	YEL042W	YKR013W
YNL238W	YGL116W	YBR186W	YOL090W	YPR157W	YOR074C	YEL017W	YJL183W	YLR049C
YNL240C	YGL163C	YBR195C	YNL031C	YNL312W	YDR097C	YEL032W	YBL004W	YOL090W
YNL244C	YGL225W	YBR198C	YAR071W	YDL163W	YFL026W	YEL075C	YBR010W	YCL024W
YLR083C	YGR044C	YBR200W	YPL158C	YGR221C	YBR089W	YEL076C	YPR019W	YMR011W
YLR087C	YGR092W	YBR202W	YML058W	YBR009C	YIL140W	YEL077C	YBL002W	YPR156C
YLR109W	YGR108W	YBR211C	YER124C	YER070W	YDR033W	YER001W	YNL233W	YPL267W
YLR465C	YGR109C	YBR214W	YML027W	YJL159W	YMR179W	YER003C	YMR011W	YKL163W
YOR059C	YGR189C	YBR215W	YBR009C	YJL118W	YKL096W	YER070W	YMR029C	YDR507C
YLR113W	YHR143W	YBR233W-A	YBR158W	YMR190C	YBR071W	YER091C	YLL022C	YAR007C
YML004C	YHR152W	YBR238C	YER001W	YMR199W	YER095W	YER095W	YNL312W	YBR089W
YOR065W	YIL066C	YBR243C	YIL066C	YOR074C	YML058W	YER189W	YNL068C	YPR203W
YOR067C	YIL106W	YBR267W	YGL055W	YGR151C	YLR049C	YER190W	YIR010W	YMR065W
YML008C	YIR008C	YBR274W	YPR156C	YHR005C	YIL129C	YFL008W	YLR049C	YNL126W
YML027W	YJL092W	YBR276C	YLR079W	YOR326W	YHR005C	YFL037W	YMR190C	YDL163W
YOR083W	YJL115W	YCL004W	YNL078W	YDL003W	YBR038W	YFR039C	YBR242W	YFL026W
YOR085W	YJL157C	YCL014W	YGL021W	YDR097C	YMR307W	YGL021W	YKL164C	YKR012C
YML031W	YJL173C	YCL016C	YML034W	YER095W	YPL267W	YGL027C	YIL066C	YPR019W
YOR087W	YJL187C	YCL024W	YDR055W	YKR098C	YPL153C	YGL116W	YCL013W	YIL129C
YOR089C	YJL194W	YCL029C	YGR109C	YGL139W	YNR009W	YGL162W	YIL141W	YPR135W
YOR091W	YJR057W	YCL048W	YGR044C	YNL145W	YJL158C	YGL216W	YLR103C	YNL312W
YOR093C	YKL042W	YCL055W	YCL022C	YMR003W	YLR274W	YGR035C	YKL113C	YML058W
YLR157C	YKL045W	YCL061C	YDL055C	YNL300W	YCL024W	YGR041W	YML101C	YAL040C
YML055W	YKL096W	YCR002C	YKR012C	YLL032C	YOR374W	YGR044C	YGL200C	YAL023C
YML058W	YKL096W-A	YCR008W	YBR071W	YPL256C	YPL141C	YGR092W	YNL058C	YDL055C
YNL166C	YKL101W	YCR010C	YPL163C	YNL309W	YOR066W	YGR108W	YJL118W	YLR463C
YML064C	YKL113C	YCR020W-B	YBL035C	YBR287W	YPL192C	YGR109C	YEL032W	YKL045W
YAL003W	YKL163W	YCR033W	YKR077W	YJL201W	YJL074C	YGR143W	YNL309W	YGL021W
YGR107W	YKL164C	YCR042C	YOR066W	YJL137C	YDL164C	YGR151C	YDL156W	YLR462W
YJL092W	YKL185W	YCR052W	YOR242C	YDL034W	YGL055W	YGR152C	YNL145W	YIL123W
YDL034W	YLR079W	YCR057C	YLR274W	YJL173C	YIL141W	YGR189C	YBL082C	YKR077W
YAL012W	YLR103C	YCR065W	YDR146C	YHL050C	YKL045W	YGR221C	YPL127C	YPR202W
YOR152C	YLR131C	YCR077C	YKL172W	YKL108W	YDR507C	YGR296W	YJL074C	YHR218W
YDL074C	YLR210W	YCR086W	YMR031C	YKL165C	YAR007C	YHL026C	YPL014W	YEL032W
YDL076C	YLR213C	YCR092C	YIL141W	YLR183C	YPL061W	YHL028W	YGL217C	YHL049C
YEL052W	YLR274W	YCR093W	YHR005C	YCR075C	YKL113C	YHL049C	YEL040W	YLR273C
YJL140W	YLR286C	YCR094W	YGR041W	YLR273C	YOL090W	YHR023W	YCL024W	YHR219W
YOR196C	YLR342W	YDL001W	YJL157C	YGL101W	YDL163W	YHR110W	YIL106W	YGR152C
YAL059W	YLR452C	YDL003W	YJL078C	YLR403W	YNL192W	YHR143W	YGR014W	YGR296W
YDL082W	YML021C	YDL008W	YCL060C	YOL012C	YPR135W	YHR218W	YGL116W	YCL060C
YJL142C	YMR001C	YDL017W	YGL116W	YMR258C	YCL060C	YIL050W	YLL028W	YLR464W
YDL084W	YMR198W	YDL020C	YML033W	YBL003C	YBR092C	YIL066C	YNL015W	YOL017W
YOR200W	YMR199W	YDL028C	YDL127W	YOL017W	YNL312W	YIL123W	YCR042C	YGR151C
YDR164C	YMR307W	YDL029W	YDR113C	YOR229W	YPR019W	YIL129C	YNL313C	YLR465C
YBR163W	YNL030W	YDL047W	YGR124W	YFL042C	YDL055C	YIL131C	YGR221C	YPL057C
YFR045W	YNL031C	YDL056W	YLR121C	YOR321W	YKR077W	YIL140W	YPL155C	YJL115W
YHR146W	YNL082W	YDL064W	YJL079C	YGL216W	YGR041W	YIL141W	YGR109C	YCR065W
YDR172W	YNL102W	YDL101C	YGR092W	YEL061C	YJL157C	YIL158W	YIL129C	YFL065C
YGL032C	YNL145W	YDL108W	YNL283C	YNL304W	YNL126W	YIL177C	YBR071W	YER032W
YKL130C	YNL192W	YDL114W	YPL061W	YFL062W	YGR108W	YIR010W	YGR152C	YHR173C
YGR061C	YNL262W	YDL115C	YMR179W	YGR189C	YLR463C	YJL051W	YMR032W	YLR466W
YDR212W	YNL289W	YDL117W	YJL115W	YMR270C	YOL012C	YJL072C	YER095W	YGL225W
YPL182C	YNL309W	YDL126C	YPL153C	YOR378W	YHL049C	YJL074C	YDL018C	YPL014W
YGL036W	YNL312W	YDL127W	YJL051W	YOR073W	YIL123W	YJL079C	YNL126W	YLL022C
YGL038C	YNL327W	YDL132W	YAR018C	YCR026C	YAL040C	YJL115W	YCL022C	YLR455W
YDR450W	YNR044W	YDL134C	YGR221C	YNL233W	YPL057C	YJL159W	YIL140W	YLR103C
YBR215W	YOL090W	YDL154W	YKL045W	YDL145C	YBR202W	YJL173C	YKR010C	YML033W
YPL188W	YOR058C	YDL155W	YIL009W	YLR455W	YCL040W	YJL181W	YGR189C	YHL050C
YMR179W	YOR074C	YDL165W	YER095W	YML058W	YMR305C	YJL187C	YDL163W	YLL032C
YPL036W	YOR264W	YDL179W	YKL096W	YIR010W	YPR203W	YJL194W	YKR012C	YFL067W
YHR052W	YOR368W	YDL188C	YLR131C	YHR110W	YBR054W	YJL195C	YKL104C	YFL068W
YDR068W	YPL153C	YDL220C	YGR152C	YFL045C	YDR055W	YJL225C	YPL153C	YER189W
YDR458C	YPL256C	YDL225W	YDL117W	YDR133C	YML033W	YJR092W	YDL055C	YFL064C
YDR150W	YPR119W	YDL226C	YDR191W	YMR078C	YHR218W	YKL045W	YOL017W	YPR175W
YGL027C	YPR120C	YDR002W	YOL017W	YNL238W	YFL064C	YKL067W	YNL300W	YFL066C
YMR183C	YPR141C	YDR004W	YIL158W	YPR104C	YNL279W	YKL069W	YJR093C	YNL339C
YDR074W	YPR159W	YDR014W-A	YML052W	YOR083W	YEL075C	YKL101W	YOR248W	YLR467W
YPR187W	YPR175W	YDR016C	YEL032W	YNL116W	YLR300W	YKL108W	YPL032C	YHR110W
YDR502C	YER078C	YDR022C	YMR215W	YFR027W	YBR067C	YKL113C	YKL008C	YCL022C
YFL064C	YER079W	YDR052C	YGR143W	YPR018W	YEL032W	YKL164C	YML065W	YMR031C
YLR406C	YLR438C-A	YDR054C	YHR023W	YFL065C	YLR462W	YKL185W	YHL050C	YOR321W
YFL066C	YLR439W	YDR055W	YLL028W	YMR216C	YPL158C	YKR010C	YER111C	YPL141C
YFL068W	YBR077C	YDR076W	YNL262W	YBR067C	YMR032W	YKR012C	YJL137C	YNL058C
YLR410W	YBR078W	YDR082W	YCL014W	YGR190C	YER189W	YKR013W	YKL045W	YMR078C
YFR002W	YDR451C	YDR099W	YMR199W	YNL015W	YLR190W	YKR021W	YKL030W	YPL032C
YIR033W	YDR452W	YDR108W	YNL300W	YPR120C	YCR065W	YKR077W	YAL040C	YOR153W
YLR414C	YKR040C	YDR113C	YHR215W	YNL197C	YFL065C	YLL002W	YFL060C	YPL061W
YEL032W	YKR042W	YDR118W	YCL012W	YDL095W	YGR152C	YLL022C	YOL090W	YEL075C
YCR058C	YDR263C	YDR130C	YHR061C	YHR152W	YLR465C	YLL028W	YBL032W	YKL101W
YER159C	YDR525W-A	YDR137W	YOR229W	YOR246C	YLR464W	YLL032C	YOR321W	YEL040W
YDR234W	YFR017C	YDR145W	YHR110W	YMR179W	YNL339C	YLR034C	YER001W	YDL093W
YMR189W	YHR151C	YDR146C	YBR157C	YPL032C	YJR092W	YLR045C	YJL091C	YJL187C
YLR022C	YJR091C	YDR150W	YGR086C	YDL103C	YNL102W	YLR049C	YPL163C	YPR174C
YDR190C	YJR092W	YDR159W	YOR153W	YPR203W	YGR151C	YLR103C	YPL247C	YKL008C
YGR120C	YKL097C	YDR166C	YMR003W	YCR030C	YDR461W	YLR121C	YGL139W	YMR001C
YCRX03C	YLR084C	YDR167W	YCR024C-A	YDR358W	YDR528W	YLR131C	YFL045C	YOL030W
YPL160W	YML100W	YDR168W	YKL116C	YIL140W	YBL032W	YLR151C	YMR274C	YDR113C
YCRX05W	YML101C	YDR172W	YEL068C	YLR379W	YPR202W	YLR183C	YGR238C	YDL018C
YJL044C	YML102C-A	YDR180W	YPR106W	YFL064C	YEL076C	YLR190W	YNR009W	YIL177C
YGR065C	YMR144W	YDR182W	YIL129C	YIL141W	YPL088W	YLR274W	YGR151C	YDL095W
YGR152C	YOR246C	YDR200C	YHR218W	YJL044C	YBL035C	YLR297W	YCR065W	YGR138C
YPL173W	YOR247W	YDR201W	YNL057W	YER122C	YOL017W	YLR313C	YDR400W	YJL091C
YIL019W	YOR248W	YDR207C	YOR308C	YDL093W	YJL051W	YLR353W	YLR083C	YNL233W
YOR239W	YOR315W	YDR217C	YPL267W	YJL002C	YPL242C	YLR383W	YOR073W	YPR120C
YBL091C	YDR147W	YDR218C	YLR455W	YPL014W	YDR309C	YLR455W	YHR152W	YHR149C
YMR298W	YDR500C	YDR226W	YLR303W	YDR530C	YJL115W	YLR462W	YHR219W	YBR092C
YNL057W	YDR501W	YDR247W	YHL049C	YPL255W	YGR296W	YLR464W	YHR146W	YGR221C
YDR011W	YER112W	YDR254W	YNL082W	YAL040C	YHR149C	YLR467W	YGL083W	YOL012C
YMR300C	YFL021W	YDR260C	YPR120C	YOR165W	YMR031C	YML027W	YKR098C	YDR400W
YNL061W	YFL022C	YDR273W	YOL019W	YBL004W	YLR467W	YML033W	YOL030W	YBL009W
YOR246C	YGL007W	YDR284C	YLR103C	YIL122W	YPR175W	YML034W	YAL023C	YKL165C
YEL071W	YGL008C	YDR285W	YOR074C	YCL013W	YIL037C	YML052W	YLR466W	YOR374W
YNL063W	YGR041W	YDR293C	YKL008C	YNL339C	YER032W	YML058W	YOR330C	YML034W
YOR248W	YHR061C	YDR303C	YNR009W	YPR174C	YMR065W	YML072C	YLR460C	YEL076C
YOR206W	YIL158W	YDR310C	YMR058W	YLL022C	YHR023W	YML102W	YIL177C	YKL104C
YNL023C	YJL051W	YDR318W	YGR151C	YJR093C	YML034W	YML119W	YKL070W	YDR528W
YAR007C	YJL158C	YDR320C-A	YJL074C	YEL040W	YGR138C	YML125C	YFL037W	YBL035C
YEL075C	YJR044C	YDR325W	YIL106W	YLR465C	YML119W	YMR001C	YKL108W	YPL221W
YNL111C	YLR189C	YDR328C	YMR011W	YOR114W	YPR120C	YMR003W	YDL103C	YKL164C
YFR053C	YLR190W	YDR356W	YJL187C	YJL183W	YFL068W	YMR031C	YCL012W	YBR070C
YHR152W	YLR300W	YDR363W-A	YBR083W	YEL075C	YLR273C	YMR032W	YER070W	YHR152W
YCL054W	YML052W	YDR364C	YER070W	YCL060C	YPL221W	YMR179W	YDL089W	YDR297W
YDR269C	YML053C	YDR369C	YDL018C	YGR014W	YLR103C	YMR198W	YKL165C	YCR042C
YML100W	YMR076C	YDR389W	YOR256C	YKL069W	YGL062W	YMR199W	YDR346C	YJR143C
YGR207C	YMR215W	YDR416W		YJR127C	YLL028W	YMR215W	YKR077W	YGR092W
YGL062W	YNR018W	YDR424C	YKL177W	YDL242W	YJL187C	YMR291W	YDR078C	YGR014W
YHR162W	YAL062W	YDR439W	YLR462W	YIL139C	YLR286C	YMR305C	YMR008C	YKL067W
YPL154C	YDR324C	YDR440W	YFL064C	YHR061C	YML100W	YNL030W	YOR144C	YPL283C
YCL060C	YDR325W	YDR451C	YCR065W	YDL018C	YHR219W	YNL031C	YNL197C	YIL106W
YDR272W	YER125W	YDR457W	YHL026C	YLL067C	YPR149W	YNL058C	YDR097C	YEL077C
YDR224C	YER189W	YDR484W	YJR092W	YBL052C	YNR067C	YNL102W	YCR097WB	YJL073W
YDR306C	YER190W	YDR488C	YKL101W	YLL061W	YKL066W	YNL160W	YBR092C	YOL132W
YKL144C	YGL227W	YDR499W	YLR297W	YDL009C	YOR153W	YNL233W	YBR287W	YLR300W
YNR064C	YGR050C	YDR507C	YER190W	YER001W	YBL112C	YNL262W	YFL044C	YBL032W
YMR014W	YHR149C	YDR517W	YJR010W	YPL208W	YOR025W	YNL283C	YMR307W	YJL225C
YBR223C	YHR150W	YDR522C	YLL022C	YOR325W	YLL032C	YNL309W	YOR372C	YKL185W
YLR214W	YIL123W	YDR523C	YPR175W	YOR372C	YBR296C	YNL312W	YJL187C	YDR074W
YPL196W	YJL186W	YEL002C	YDR309C	YDR346C	YOR315W	YNL327W	YKL185W	YJR092W
YOL070C	YJL196C	YEL037C	YLR353W	YER151C	YDR481C	YNR009W	YDR297W	YPL004C
YGR296W	YJR127C	YEL061C	YBL023C	YPL116W	YGR092W	YOL007C	YDL096C	YCL040W
YOL072W	YML027W	YER007W	YLR313C	YJL091C	YFL067W	YOL017W	YGL097W	YJL158C
YDR312W	YMR179W	YER008C	YKL178C	YMR261C	YFL066C	YOL019W	YLR270W	YER118C
YGL054C	YNL241C	YER016W	YLL032C	YMR307W	YCL022C	YOL090W	YNL283C	YJL118W
YNR072W	YNL298W	YER018C	YOR058C	YPL072W	YLR452C	YOR025W	YPL227C	YLR372W
YHR023W	YPR149W	YER044C-A	YOR307C	YOR104W	YLR194C	YOR058C	YJL073W	YKL066W
YBR078W	YAL024C	YER066W	YEL075C	YDL055C	YGR014W	YOR066W	YBR078W	YPR119W
YFL026W	YAL028W	YER075C	YPR135W	YEL058W	YLR466W	YOR084W	YOR008C	YGL116W
YNL259C	YAL029C	YER089C	YGL008C	YBL082C	YBL023C	YOR153W	YPL004C	YPL208W
YKL004W	YBL032W	YER095W	YJL194W	YGR092W	YHR110W	YOR229W	YFL067W	YDL010W
YLR372W	YBL033C	YER106W	YJL118W	YHR173C	YPR160W	YPL061W	YPR018W	YDL156W
YPR149W	YBR070C	YER111C	YOR114W	YHR149C	YGL037C	YPL127C	YHR153C	YGL163C
YDR084C	YBR071W	YER122C	YEL076C	YBR130C	YHR087W	YPL153C	YMR179W	YMR032W
YMR191W	YBR133C	YER123W	YLR467W	YHR092C	YHR173C	YPL163C	YPL036W	YLL002W
YFL036W	YBR135W	YER133W	YPR019W	YJR143C	YKL067W	YPL208W	YMR284W	YEL042W
YGL028C	YBR138C	YER147C	YCR042C	YCR045C	YLR056W	YPL256C	YDR113C	YGL032C
YER111C	YBR139W	YER155C	YLR194C	YDR074W	YHL050C	YPL267W	YMR199W	YNL082W
YDR472W	YBR158W	YER162C	YLR464W	YPR175W	YEL077C	YPR018W	YGL216W	YOR073W
YER001W	YCR064C	YER167W	YBL111C	YNR023W	YKL008C	YPR106W	YMR183C	YLR180W
YKL053W	YCR065W	YER173W	YLR383W	YBR043C	YNL082W	YPR119W	YPR047W	YLR343W
YJL158C	YDR507C	YER177W	YCL013W	YEL017W	YLR131C	YPR120C	YLR236C	YKR010C
YDR134C	YDR509W	YER179W	YGL089C	YML027W	YDL117W	YPR135W	YPR104C	YGL101W
YDR514C	YDR526C	YER180C	YKL067W	YLR149C	YMR078C	YPR149W	YDL010W	YNL231C
YMR243C	YEL007W	YFL003C	YER189W	YDR089W	YCL042W	YPR156C	YNL087W	YOR386W
YPR203W	YEL040W	YFL005W	YIL177C	YLR050C	YBR093C	YPR174C	YPL221W	YNL015W
YLL051C	YER094C	YFL008W	YGR035C	YGR035C	YCR042C	YPR175W	YPR135W	YNL072W
YLL034C	YER177W	YFL009W	YER003C	YOR233W	YCR089W	YPR202W	YPR119W	YEL017W
YGR085C	YGL038C	YFL017C	YBR093C	YGR238C	YGL225W	YBL032W	YIL158W	YDR545W
YOL115W	YGL114W	YFL029C	YOR320C	YOL069W	YOL030W	YBL052C	YKL101W	YGL217C
YLL061W	YGL179C	YFL033C	YLL002W	YCR065W	YGL116W	YBL063W	YNL339C	YBR202W
YOR045W	YGR109W-A	YFL034C-B	YMR305C	YHR139C	YJL225C	YBR070C	YLR462W	YDL096C
YJL052W	YGR109W-B	YFL037W	YGL184C	YPR191W	YLR413W	YDL163W	YPL116W	YFL045C
YLR034C	YGR110W	YFL039C	YLR463C	YPR019W	YER150W	YDR130C	YLR235C	YBL112C
YJL060W	YGR234W	YFR008W	YAL022C	YOR195W	YPR174C	YFR027W	YGL225W	YKL108W
YDL050C	YHL023C	YFR027W	YCL023C	YNL240C	YKL104C	YGL101W	YPR106W	YNL102W
YJL110C	YHL024W	YFR028C	YPL036W	YHR146W	YNL057W	YGR042W	YLR372W	YJL051W
YNL262W	YHR195W	YFR031C	YBR070C	YFL068W	YDL018C	YIL026C	YGR296W	YGL038C
YOR170W	YJL078C	YFR036W	YLL066C	YLR049C	YNL160W	YJL137C	YPL208W	YDR481C
YAL031C	YJL080C	YFR037C	YJL225C	YJL198W	YPL014W	YLL067C	YEL016C	YLR083C
YAL033W	YJL148W	YFR040W	YBL113C	YJL187C	YNL072W	YLR194C	YLR056W	YAR031W
YDL212W	YJL159W	YFR046C	YOR263C	YHR153C	YNL233W	YLR463C	YHR173C	YBL023C
YGR177C	YJL160C	YFR052W	YGR230W	YLR464W	YDR545W	YNR066C	YDL003W	YPR204W
YEL074W	YJR109C	YGL003C	YDR355C	YLR138W	YPL032C	YNR067C	YPL128C	YPL255W
YNL031C	YJR110W	YGL019W	YAR008W	YKL067W	YMR232W	YOR195W	YHR023W	YKR098C
YEL076C	YKL084W	YGL021W	YJL181W	YER104W	YDR400W	YOR307C	YLL033W	YDL103C
YJL162C	YKL112W	YGL028C	YGR296W	YOR144C	YIL177C	YPR019W	YHR218W	YPL116W
YDL104C	YKR011C	YGL033W	YOR315W	YCRX12W	YCL013W	YAL007C	YPR174C	YJL019W
YKR013W	YKR013W	YGL045W	YPR174C	YGL020C	YIL131C	YCR041W	YOL132W	YNL309W
YNL113W	YLR104W	YGL048C	YMR198W	YPL221W	YNL262W	YDR400W	YOR188W	YKL096W
YOR298W	YLR332W	YGL056C	YLR212C	YBL080C	YPL283C	YER170W	YDR150W	YCR089W
YNL037C	YLR397C	YGL061C	YPL141C	YLR180W	YBL111C	YGL207W	YPR203W	YML060W
YAR031W	YLR399C	YGL073W	YDR503C	YDR528W	YBR070C	YGR176W	YHR126C	YNL283C
YJL168C	YLR400W	YGL075C	YCR041W	YNR003C	YIL106W	YHR205W	YDR530C	YOR195W
YGL008C	YML028W	YGL086W	YKL108W	YLR463C	YCL012W	YJL091C	YJR006W	YCL042W
YDL183C	YML063W	YGL090W	YJL173C	YIR034C	YIL158W	YJR010W	YNL238W	YNL192W
YNR028W	YML064C	YGL106W	YHR208W	YDR400W	YBR158W	YKL048C	YLR467W	YBR287W
YKR021W	YMR135W-A	YGL112C	YEL065W	YDL197C	YOR321W	YOR073W	YHR135C	YJL157C
YBR189W	YMR165C	YGL116W	YNL339C	YDR044W	YPR106W	YOR176W	YNL181W	YLL028W
YIL088C	YMR306C-A	YGL155W	YKL113C	YML061C	YDL037C	YCR065W	YJL116C	YBR067C
YCL062W	YNL300W	YGL158W	YPL208W	YOR343C	YBL004W	YDL156W	YPR202W	YDR309C
YDR194C	YNL301C	YGL163C	YOR324C	YCL022C	YGR221C	YER032W	YCL060C	YJL018W
YCL064C	YNL328C	YGL173C	YLL067C	YOR033C	YNL036W	YGR230W	YOR229W	YLR190W
YKL116C	YOL113W	YGL175C	YBR067C	YOR153W	YEL040W	YPL116W	YGL055W	YGR041W
YPL242C	YOL114C	YGL178W	YKL127W	YCL003W	YNL134C	YAL040C	YDR191W	YPL242C
YLR180W	YOR073W	YGL181W	YPL057C	YNL308C	YNL066W	YDR528W	YBR089W	YDR516C
YPL244C	YOR138C	YGL190C	YLR413W	YGR296W	YAL023C	YGL163C	YER151C	YBL004W
YKL156W	YOR140W	YGL192W	YLR231C	YBL032W	YNL015W	YOR033C	YLL002W	YDL009C
YDR276C	YOR372C	YGL194C	YGL101W	YPL155C	YHR152W	YGL060W	YGR153W	YLR056W
YHR218W	YOR373W	YGL207W	YJR004C	YDR142C	YKL101W	YJL157C	YLR342W	YPR018W
YKL160W	YPL024W	YGL213C	YOL030W	YDL234C	YDR297W	YKL008C	YNL221C	YLR235C
YKL162C	YPL025C	YGL215W	YNL145W	YKL104C	YGL038C	YCL023C	YOL069W	YML119W
YPL250C	YPL056C	YGL216W	YPR203W	YMR284W	YDR451C	YLL066C	YPL269W	YPR157W
YIL003W	YPL126W	YGL229C	YLR326W	YML065W	YMR198W	YOR114W	YDR061W	YOR246C
YKL164C	YPL127C	YGL233W	YBR200W	YBR041W	YLL022C	YOR256C	YGL038C	YDR451C
YBR089W	YPL155C	YGL240W	YIL131C	YLR385C	YFL011W	YIL056W	YHR188C	YDR124W
YLR384C	YPL163C	YGL249W	YIL123W	YHR218W	YDR516C	YKL044W	YMR261C	YJL173C
YOL086C	YPR035W	YGL251C	YPR157W	YHL049C	YKL165C	YKL163W	YER020W	YBR038W
YBR094W	YAL017W	YGR023W	YBR073W	YJR076C	YKL209C	YLR303W	YHL026C	YGR065C
YFL065C	YAL018C	YGR029W	YJL195C	YBR168W	YCR024C-A	YMR078C	YMR075W	YJL084C
YOL088C	YBL023C	YGR044C	YDL179W	YML102W	YPL156C	YDL157C	YGL257C	YNL197C
YOL090W	YBL081W	YGR049W	YDL101C	YML060W	YGR084C	YHR005C	YCR102C	YOR315W
YBR136W	YBL082C	YGR063C	YPR202W	YHR135C	YHL021C	YKR037C	YHR110W	YHR023W
YDR138W	YBL083C	YGR078C	YLR342W	YIL050W	YAR071W	YMR076C	YGR286C	YIR010W
YAL028AW	YBL108W	YGR089W	YHR153C	YGL162W	YMR048W	YBL023C	YOR247W	YMR190C
YHR119W	YBR029C	YGR092W	YGR188C	YGL097W	YGR086C	YEL076C-A	YJR143C	YOL019W
YLR432W	YBR030W	YGR098C	YCL055W	YOR018W	YLR343W	YOL094C	YPL242C	YGL200C
YGL257C	YBR037C	YGR108W	YOR264W	YIL070C	YJR143C	YGR055W	YMR131C	YLR045C
YKL067W	YBR038W	YGR109C	YCL061C	YLR266C	YLR079W	YPL241C	YPL057C	YJR006W
YKL069W	YBR104W	YGR113W	YOL158C	YFR049W	YDL009C	YBR200W	YLR045C	YOR144C
YLR438W	YBR162C	YGR129W	YDR077W	YPR202W	YCL064C	YDR451C	YBR043C	YDR355C
YLR305C	YBR162W-A	YGR132C	YNR044W	YPL267W	YMR250W	YML065W	YPR111W	YGR120C
YDR526C	YBR229C	YGR140W	YLR045C	YMR183C	YKL162C	YOR018W	YEL077C	YHL021C
YCR087W	YCL063W	YGR179C	YER111C	YMR274C	YNL283C	YOR188W	YDR126W	YJL170C
YCR089W	YCL064C	YGR188C	YMR145C	YGR071C	YLR455W	YAL022C	YPR175W	YGL037C
YLR002C	YCR024C-A	YGR209C	YLR438W	YCR033W	YOR342C	YBR008C	YGR035C	YBL111C
YGR041W	YCR075C	YGR211W	YKL001C	YLL012W	YER190W	YGL201C	YKR029C	YGR108W
YMR109W	YCR092C	YGR225W	YBR086C	YJR161C	YKR042W	YOL014W	YFL066C	YDL117W
YGR086C	YCR093W	YGR230W	YPR204W	YKL032C	YDR074W	YBL112C	YFL068W	YNL262W
YDL002C	YDL017W	YGR231C	YML064C	YNL283C	YDR124W	YJL118W	YBL028C	YPL192C
YGR081C	YDL018C	YGR233C	YHL050C	YBR049C	YDR113C	YBR157C	YNL273W	YPR106W
YPL245W	YDL032W	YGR245C	YEL076C-A	YOL030W	YDR146C	YBR172C	YLR437C	YML100W
YER145C	YDL035C	YGR247W	YKR042W	YOL080C	YPL155C	YJL134W	YJL084C	YJL183W
YPL253C	YDL084W	YGR253C	YNL102W	YLL028W	YCLX07W	YLR032W	YLL051C	YIL131C
YDL062W	YDL101C	YGR258C	YGR177C	YPL004C	YPR204W	YOR074C	YIL050W	YCL012W
YEL036C	YDL173W	YGR271C-A	YPR018W	YBL035C	YJL073W	YER118C	YPR034W	YJL181W
YAL040C	YDL174C	YGR274C	YBL112C	YNL118C	YLR342W	YIL106W	YDR354W	YLR342W
YER118C	YDL223C	YHL022C	YMR238W	YDR516C	YKL096W-A	YKL116C	YLR465C	YCL013W
YEL042W	YDL225W	YHL024W	YLR466W	YKL009W	YBL009W	YDR147W	YBL023C	YLL012W
YDL070W	YDL226C	YHL027W	YHR086W	YHR018C	YPL255W	YLR212C	YMR078C	YGL055W
YGR138C	YDR054C	YHR004C	YPL242C	YJL115W	YLR045C	YMR253C	YOR175C	YGL027C
YOL051W	YDR055W	YHR013C	YKL048C	YER038C	YJR030C	YDR150W	YOR233W	YMR258C
YGR151C	YDR112W	YHR014W	YLR210W	YHR107C	YKL004W	YLR466W	YGL101W	YML101C
YNL003C	YDR148C	YHR023W	YML102W	YKL099C	YDL010W	YNL273W	YOR195W	YGL139W
YGR189C	YDR154C	YHR030C	YJR148W	YLR250W	YOR273C	YHL050C	YFL062W	YOR229W
YER009W	YDR155C	YHR071W	YPL116W	YGL065C	YPL092W	YIL119C	YKR042W	YHR061C
YNL043C	YDR156W	YHR079C-A	YDR451C	YLR083C	YDL095W	YLR057W	YOR056C	YOR099W
YGL157W	YDR157W	YHR086W	YNL015W	YDR001C	YDR343C	YKL001C	YDL238C	YMR075W
YBL111C	YDR158W	YHR101C	YGL216W	YOR237W	YDR355C	YCR040W	YGL163C	YFL011W
YKL204W	YDR179C	YHR102W	YOR188W	YIL147C	YCL061C	YGR138C	YML027W	YDR077W
YOR264W	YDR179W-A	YHR107C	YDR528W	YER118C	YLR372W	YGL187C	YKL067W	YFR027W
YBL113C	YDR389W	YHR115C	YCL063W	YIL132C	YLR180W	YER077C	YOR018W	YBR161W
YER017C	YDR441C	YHR119W	YDR356W	YOR099W	YAR018C	YNL068C	YJR076C	YOR018W
YCL027W	YDR442W	YHR124W	YBR138C	YKR090W	YDL101C	YLR234W	YLR343W	YNL160W
YGL020C	YDR461W	YHR129C	YNL233W	YIL177C	YGL101W	YHR159W		YOR025W
YKL118W	YDR528W	YHR135C	YNL309W	YDR058C	YDL093W	YAR008W		YDL027C
YIL049W	YDR543C	YHR143W	YOR247W	YKR012C	YKL108W	YOL030W		YDR033W
YNR038W	YEL015W	YHR152W	YER032W	YJL181W	YLL002W	YCL063W		YGR238C
YIL051C	YEL016C	YHR153C	YDL211C	YDR545W	YJL173C	YPL036W		YMR198W
YCL048W	YEL044W	YHR157W	YOR298W	YLL033W	YPL004C	YPL057C		YNL068C
YKL122C	YEL045C	YHR165C	YER091C	YOL008W	YKL030W	YNL078W		YBL082C
YNR044W	YEL046C	YHR166C	YDL164C	YPL253C	YLR236C	YNL206C		YPR104C
YNR046W	YEL076W-C	YHR172W	YLR300W	YAR029W	YMR295C	YPL242C		YDR530C
YIL094C	YEL077C	YHR184W	YGR138C	YOL022C	YNL068C	YKL130C		YGL216W
YGR014W	YER081W	YHR191C	YML060W	YDR297W	YOR386W	YML012W		YER150W
YBR243C	YER087C-A	YHR205W	YJL060W	YKL163W	YLL066C	YPL158C		YJR076C
YGL068W	YER126C	YHR206W	YJL019W	YAL023C	YEL011W	YJR030C		YNL278W
YDR033W	YER127W	YHR208W	YDR130C	YLR466W	YBL113C	YOR321W		YLR236C
YGL225W	YFL013W-A	YIL026C	YOR273C	YOR132W	YFL045C	YCR042C		YDR342C
YPL218W	YFL027C	YIL031W	YIL026C	YDR204W	YJL019W	YLR326W		YIL158W
YIL009W	YFL063W	YIL035C	YOL070C	YKR080W	YJL118W	YIL132C		YBR242W
YIL011W	YFL064C	YIL046W	YOR073W	YFL037W	YDL156W	YEL047C		YNL327W
YGR227W	YFL065C	YIL068C	YGL163C	YKL191W	YEL017W	YKL165C		YGL062W
YLR190W	YFR003C	YIL072W	YDR501W	YGL083W	YJL092W	YPR203W		YPL253C
YKL174C	YFR004W	YIL073C	YDL227C	YOR300W	YOL132W	YFL068W		YBR296C
YML125C	YGL021W	YIL095W	YOR248W	YNL191W	YNL078W	YMR191W		YDR133C
YPL256C	YGL032C	YIL106W	YPL241C	YPL145C	YLL067C	YMR037C		YLR194C
YCLX07W	YGL092W	YIL112W	YER042W	YLR372W	YLR083C	YNL300W		YKR061W
YPL072W	YGL108C	YIL122W	YGL201C	YOR373W	YJL091C	YDR261C		YKL209C
YGR233C	YGL228W	YIL123W	YOR033C	YOR006C	YCL014W	YLR457C		YJL092W
YLR196W	YGL229C	YIL126W	YHR151C	YLR085C	YBR066C	YAR003W		YCRX18C
YNL283C	YGR013W	YIL131C	YGL038C	YNL336W	YGL163C	YML060W		YNL134C
YOL092W	YGR014W	YIL132C	YOR084W	YHR035W	YHR143W	YOL113W		YPL227C
YPR019W	YGR047C	YIL135C	YML125C	YDR202C	YLL012W	YJL078C		YNL057W
YDR497C	YGR048W	YIL144W	YBR008C	YFR014C	YBL001C	YHR153C		YNL238W
YGR279C	YGR086C	YIL150C	YPR141C	YJR006W	YER118C	YOR105W		YDR222W
YFR030W	YGR125W	YIL153W	YKL066W	YJR135C	YCRX05W	YOL069W		YNL044W
YLR242C	YGR151C	YIR006C	YDR089W	YBL009W	YCR009C	YJR006W		YLR131C
YCR042C	YGR152C	YIR008C	YBR108W	YBR161W	YDR133C	YBR242W		YLR050C
YPR025C	YGR153W	YIR010W	YGL255W	YJL218W	YOL019W	YPL124W		YGR035C
YHR135C	YGR221C	YIR011C	YNL192W	YOR330C	YML128C	YNL276C		YMR305C
YLR446W	YGR229C	YIR024C	YKL069W	YHR219W	YIL117C	YHR050W		YNL273W
YER190W	YGR230W	YIR025W	YDL103C	YLR263W	YBR083W	YNL057W		YNR044W
YHR137W	YGR254W	YIR026C	YMR189W	YGL119W	YDL027C	YKR004C		YJL164C
YFR039C	YGR296W	YJL005W	YOR176W	YAL012W	YLR313C	YPL283C		YJR030C
YPL128C	YHL028W	YJL013C	YPL155C	YMR011W	YPL116W	YML068W		YLR452C
YMR215W	YHL029C	YJL019W	YJL217W	YLR056W	YKR092C	YMR020W		YBR066C
YPR175W	YHR063C	YJL030W	YFL067W	YLR080W	YMR190C	YBR138C		YER190W
YHR139C	YHR091C	YJL034W	YDR481C	YOR043W	YBR078W	YLR380W		YOR273C
YDR492W	YHR098C	YJL047C	YKR010C	YDR061W	YDR251W	YJR003C		YFL060C
YPR183W	YHR099W	YJL074C	YDR507C	YLR437C	YDR222W	YFL067W		YPR034W
YDR534C	YHR138C	YJL076W	YGR099W	YJR031C	YGR065C	YNL176C		YLL067C
YJL033W	YHR193C	YJL080C	YGR279C	YLL008W	YFL033C	YGL217C		YKL096W-A
YPL127C	YHR194W	YJL085W	YOR195W	YLR342W	YBR287W	YLR180W		YPL156C
YGR055W	YIL009W	YJL090C	YER118C	YOR230W	YPL041C	YCL013W		YHR087W
YJL074C	YIL015W	YJL095W	YEL017W	YDR354W	YOL158C	YER111C		YNL304W
YLR056W	YIL026C	YJL098W	YKL042W	YDR302W	YBL082C	YMR200W		YMR295C
YMR274C	YIL050W	YJL106W	YMR307W	YMR029C	YFR053C	YOR308C		YJL044C
YJL076W	YIL051C	YJL141C	YDR085C	YGR026W	YNL044W	YGR188C		YPR160W
YLR058C	YIL076W	YJL146W	YIL119C	YNR055C	YJL018W	YHR061C		YOR033C
YDL018C	YIL077C	YJL157C	YLR373C	YNL216W	YHR018C	YMR258C		YPL088W
YJL078C	YIL128W	YJL187C	YDL037C	YBR070C	YAR031W	YPL108W		YDR503C
YPL283C	YIL129C	YJL194W	YER170W	YOR084W	YOR264W	YER147C		YKR090W
YLR064W	YIR020C	YJR021C	YPL058C	YIR011C	YPL208W	YER124C		YOL147C
YLR066W	YIR020W-B	YJR053W	YLR273C	YDL159W	YPR104C	YDR085C		YBR054W
YER020W	YJL045W	YJR059W	YKL165C	YGL032C	YNL197C	YDR342C		YNL206C
YMR102C	YJL075C	YJR060W	YBL063W	YMR118C	YOR263C	YNL334C		YDR055W
YER022W	YJL079C	YJR066W	YPR111W	YHR188C	YDR089W	YDL241W		YKR092C
YAR073W	YJL100W	YJR068W	YNL126W	YOR112W	YOR195W	YLR288C		YBL001C
YDL128W	YJL101C	YJR076C	YKR039W	YJL020C	YBR098W	YGR129W		YPR149W
YBL003C	YJR030C	YJR089W	YDL163W	YLR169W	YOL124C	YGR177C		YDL101C
YBL039C	YJR145C	YJR090C	YDR149C	YJL119C	YNL042W	YOR144C		YPL181W
YDR225W	YJR146W	YJR091C	YGL207W	YER061C	YMR058W	YEL042W		YBR093C
YDL176W	YJR147W	YJR094C	YNL289W	YNL313C	YER091C	YLR286C		YCR024C-A
YER070W	YJR148W	YJR112W	YMR078C	YJL164C	YDR342C	YOR315W		YAL007C
YDL178W	YJR149W	YJR135C	YOR314W	YPL168W	YOR073W	YAL023C		YGR143W
YBR010W	YKL007W	YJR140C	YLR041W	YER189W	YER003C	YDR346C		YML102W
YGL206C	YKL008C	YKL017C	YGR176W	YAR008W	YDR285W	YJR054W		YPL041C
YBR263W	YKL103C	YKL022C	YJL044C	YBR296C	YEL042W	YBR261C		YGR086C
YCR033W	YKL142W	YKL042W	YLR095C	YBR071W	YML060W	YKL043W		YBR044C
YNL099C	YKL150W	YKL048C	YLL062C	YDR503C	YJL194W	YML064C		YDR358W
YOR284W	YKL151C	YKL049C	YLR142W	YAL021C	YJL116C	YGL028C		YBR040W
YBR054W	YKL186C	YKL052C	YNL312W	YKL111C	YDL179W	YKL129C		YFL037W
YGL162W	YKL209C	YKL089W	YIL167W	YNL087W	YGL065C	YOR373W		YMR216C
YEL016C	YKR054C	YKL101W	YHR219W	YJL092W	YOR382W	YFL064C		YER071C
YDR002W	YKR055W	YKL112W	YDR297W	YJL084C	YBR084W	YJL212C		YNL166C
YIL106W	YKR093W	YKL138C-A	YGR014W	YDL026W	YOR144C	YGR099W		YKL030W
YOR326W	YLR012C	YKL145W	YDR400W	YNL273W	YBL069W	YNL165W		YNL066W
YEL047C	YLR013W	YKL161C	YOL069W	YHR205W	YDL103C	YLR189C		YPL155C
YNL145W	YLR055C	YKL189W	YLR235C	YIL131C	YJR010W	YMR238W		YCLX07W
YJR042W	YLR056W	YKL193C	YPR075C	YCL062W	YPL036W	YDR324C		YEL011W
YCL011C	YLR078C	YKL203C	YBR243C	YLR373C	YLR214W	YHR219W		YLR413W
YLR200W	YLR194C	YKR028W	YGL027C	YMR198W	YDL197C	YPR076W		YER003C
YMR001C	YLR207W	YKR029C	YOR391C	YDR191W	YML131W	YER018C		YJL201W
YPL264C	YLR209C	YKR031C	YEL047C	YCR029C	YCL023C	YNL289W		YHL026C
YLR262C	YLR255C	YKR037C	YAL040C	YER126C	YDL096C	YLR437C		YMR029C
YMR003W	YLR256W	YKR042W	YPL283C	YLR462W	YHR097C	YOR337W		YDL089W
YOL060C	YLR256W-A	YKR046C	YIR010W	YDL113C	YPR157W	YDR356W		YCL061C
YHL007C	YLR273C	YKR048C	YPL187W	YOR345C	YBR223C	YFL066C		YBR223C
YOR340C	YLR287C-A	YKR054C	YPL128C	YBR113W	YNL166C	YJL099W		YKL004W
YDR302W	YLR346C	YKR063C	YLR452C	YLR210W	YKL043W	YGL038C		YCL064C
YLR268W	YLR353W	YKR072C	YPL269W	YER077C	YGR035C	YJL018W		YDL037C
YOR342C	YLR367W	YKR083C	YJR137C	YML012W	YJL164C	YBL001C		YOR083W
YJR002W	YML007W	YLL003W	YCR040W	YCR008W	YKL029C	YMR011W		YBR078W
YJR063W	YML008C	YLL016W	YLR180W	YMR219W	YCL055W	YMR163C		YBR049C
YHL049C	YML050W	YLR007W	YKL130C	YGR188C	YIL079C	YOR006C		YHR153C
YPL274W	YML111W	YLR043C	YEL061C	YNL192W	YGL184C	YCLX05C		YAR018C
YOR382W	YML125C	YLR045C	YJR030C	YJR043C	YLR098C	YDR488C		YMR183C
YLR310C	YML131W	YLR075W	YIL056W	YLL051C	YOR220W	YPR204W		YBR084W
YOR384W	YMR002W	YLR079W	YGR042W	YDR390C	YKR061W	YKL094W		YBR098W
YHR003C	YMR016C	YLR086W	YHR149C	YGL015C	YLL061W	YNL339C		YPL158C
YDR346C	YMR017W	YLR102C	YLR234W	YGL207W	YNL276C	YDL197C		YIL037C
YHR005C	YMR070W	YLR103C	YOR018W	YPL015C	YBR044C	YJR155W		YGR084C
YER167W	YMR078C	YLR117C	YFL037W	YOL056W	YNL293W	YDR507C		YHL048W
YJR110W	YMR079W	YLR127C	YER019W	YDL096C	YBL016W	YPR128C		YKR042W
YMR059W	YMR086W	YLR129W	YGR140W	YHR108W	YBR243C	YPR111W		YJR053W
YOR390W	YMR135C	YLR131C	YML072C	YKR013W	YBR015C	YDL043C		YDR126W
YFL067W	YMR136W	YLR166C	YER018C	YJL018W	YDR077W	YHR152W		YOR028C
YHR009C	YMR183C	YLR175W	YDR150W	YGR222W	YFL037W	YMR075W		YMR253C
YOL112W	YMR184W	YLR176C	YJL201W	YDL011C	YKL218C	YFR026C		YHR086W
YDL149W	YMR251W-A	YLR178C	YDL039C	YFR034C	YHL026C	YGR222W		YLR079W
YMR067C	YMR261C	YLR179C	YBL061C	YPL124W	YPL253C	YML133C		YNL116W
YKR051W	YMR262W	YLR182W	YML133C	YDR488C	YLR223C	YKR029C		YDR146C
YOR373W	YMR304C-A	YLR210W	YKR037C	YKL101W	YHR215W	YPL026C		YGR269W
YKR053C	YMR305C	YLR212C	YJR006W	YOR227W	YLR258W	YFR015C		YDR261C
YMR073C	YMR306W	YLR215C	YMR002W	YLR314C	YOL109W	YDR518W		YCRX05W
YDL163W	YNL053W	YLR226W	YHR135C	YFR042W	YOR028C	YKL042W		YEL061C
YOL124C	YNL056W	YLR229C	YGL060W	YBR158W	YNL037C	YPL209C		YPR008W
YDR364C	YNL058C	YLR234W	YNL037C	YFL008W	YBR230C	YKL143W		YBR015C
YDR404C	YNL154C	YLR238W	YPL021W	YIL023C	YLR178C	YPL075W		YOL011W
YIL164C	YNL178W	YLR248W	YML061C	YLR450W	YGR120C	YBL060W		YOR342C
YMR123W	YNL231C	YLR263W	YJL018W	YHR118C	YHR146W	YBL055C		YBL113C
YDR408C	YNL269W	YLR272C	YPL253C	YGL217C	YML047C	YDR197W		YBR041W
YGL234W	YNL271C	YLR274W	YGR055W	YCL063W	YBR242W	YPL227C		YJL137C
YOR383C	YNL295W	YLR286C	YHR126C	YDR451C	YML065W	YFL045C		YKL162C
YCL013W	YNL297C	YLR288C	YOR383C	YPR106W	YOR083W	YDR077W		YDR089W
YCL022C	YNL337W	YLR299W	YNL328C	YMR163C	YDL038C	YML021C		YGL036W
YER042W	YNR009W	YLR305C	YNL176C	YPR034W	YLR058C	YBR275C		YDL207W
YCL024W	YNR028W	YLR310C	YGL093W	YOR066W	YKL116C	YNL118C		YAR071W
YHR077C	YNR062C	YLR314C	YKR091W	YLR326W	YKL128C	YLR154C		YMR250W
YOR352W	YNR063W	YLR319C	YDR279W	YNL072W	YDR149C	YHR154W		YEL036C
YJR073C	YOL011W	YLR321C	YCL065W	YGR143W	YDL127W	YEL040W		YKL116C
YDL164C	YOL012C	YLR329W	YIL050W	YPR156C	YBR161W	YKL062W		YDR343C
YJR118C	YOL023W	YLR332W	YLR154C	YGL021W	YDR302W	YBL082C		YMR277W
YLR326W	YOL030W	YLR356W	YNL046W	YGL093W	YOL070C	YNR013C		YLL058W
YPR053C	YOL031C	YLR357W	YFR039C	YIL158W	YJL217W	YER152C		YDR251W
YDL117W	YOR066W	YLR361C	YIR017C	YCR042C	YLR050C	YKL104C		YHR126C
YDL148C	YOR075W	YLR381W	YML012W	YDR279W	YDR085C	YPR165W		YHR018C
YEL0171C	YOR236W	YLR383W	YLR034C	YER152C	YBR052C	YIL156W		YLL051C
YOR010C	YOR344C	YLR394W	YKL052C	YBR152W	YGR055W	YHR086W		YNL036W
YPR101W	YOR388C	YLR403W	YLR057W	YGL027C	YNL309W	YNL310C		YJL097W
YMR190C	YOR389W	YML015C	YPL124W	YLR235C	YER124C	YDR348C		YNL181W
YPR103W	YPL032C	YML027W	YHR137W	YHR086W	YBR214W	YGL139W		YML065W
YDL121C	YPL050C	YML031W	YDL096C	YMR296C	YOR246C	YGL262W		YLL066C
YDL152W	YPL081W	YML034W	YDR353W	YLR380W	YJL033W	YDR011W		YCL023C
YMR145C	YPL082C	YML058W-A	YNL134C	YBL053W	YIR010W	YLR386W		YBR254C
YDL150W	YPL139C	YML064C	YPR159W	YJR010W	YNL238W	YDR176W		YNL279W
YDL156W	YPL140C	YML085C	YIL132C	YLR236C	YIL080W	YOR342C		YMR232W
YER091C	YPL141C	YML098W	YPL032C	YJR155W	YPR018W	YBL094C		YLR286C
YBL071C	YPL157W	YML102W	YAR003W	YMR031C	YMR183C	YLR126C		YLR270W
YER095W	YPL158C	YML104C	YPR076W	YOL149W	YNL273W	YDL095W		YHR146W
YBR279W	YPL275W	YML109W	YPL274W	YPR008W	YPR124W	YJR110W		YBR158W
YJL097W	YPL276W	YML115C	YLR084C	YNL335W	YGL008C	YFL065C		YGL065C
YJL099W	YPL277C	YML124C	YKR041W	YCL014W	YJL183W	YOR324C		YDR461W
YBR289W	YPL278C	YML128C	YKL103C	YDL211C	YDL083C	YOL012C		YLR313C
YCL030C	YPL283C	YMR001C	YDR247W	YPL209C	YJR006W	YDR215C		YNL078W
YCL032W	YPR009W	YMR028W	YCL025C	YER190W	YJL015C	YER078C		YNL220W
YCL036W	YPR075C	YMR029C	YOR323C	YLR131C	YJL181W	YLR233C		YDL142C
YHL025W	YPR112C	YMR032W	YJL134W	YBL023C	YIR019C	YBL100C		YIL103W
YLR286C	YPR113W	YMR036C	YHR152W	YBR078W	YER071C	YOR289W		YFL062W
YHL029C	YPR183W	YMR043W	YML109W	YLL066C	YBL039C	YNL201C		YGR286C
YCL014W	YPR195C	YMR048W	YEL040W	YDR507C	YHR104W	YGL114W		YHR139C
YPL012W		YMR052W	YDL138W	YML033W	YBR049C	YPL155C		YBR083W
YER189W		YMR055C	YMR253C	YEL076C	YJL078C	YNL053W		YKL070W
YJR132W		YMR076C	YBL009W	YCR035C	YKR010C	YMR029C		YEL016C
YIL138C		YMR078C	YDL093W	YKL048C	YDR503C	YGL126W		YIL117C
YKR079C		YMR094W	YHR159W	YCL012W	YOR347C	YGL185C		YMR261C
YKR081C		YMR104C	YJL119C	YJL122W	YPR034W	YGR017W		YNR067C
YGL093W		YMR106C	YIL168W	YGR041W	YFR027W	YLR420W		YDL197C
YOR026W		YMR117C	YKR090W	YPL241C	YDR515W	YDR353W		YOL020W
YDR432W		YMR127C	YMR015C	YDL101C	YNL231C	YDR108W		YOR264W
YPR119W		YMR133W	YDR440W	YPL128C	YGL139W	YOR247W		YMR058W
YDR436W		YMR137C	YBL098W	YBR200W	YAR073W	YPR185W		YMR048W
YDL153C		YMR138W	YER152C	YML125C	YDL039C	YDL011C		YFL033C
YGL097W		YMR139W	YKL096W-A	YDL138W	YBR068C	YKL176C		YOR233W
YKL158W		YMR167W	YGL162W	YPR128C	YHR050W	YCL062W		YDR436W
YBL083C		YMR168C	YMR163C	YBR202W	YGL207W	YLR300W		YDR330W
YGL116W		YMR190C	YKL043W	YJL099W	YGL027C	YFR014C		YHR143W
YJL206C		YMR198W	YDL102W	YDL157C	YOR099W	YDL211C		YCR009C
YCL040W		YMR199W	YKL035W	YER003C	YLL058W	YIL051C		YOR263C
YDR097C		YMR200W	YJL073W	YPL157W	YHR061C	YDR266C		YLL008W
YGR026W		YMR201C	YER016W	YGL055W	YCL027W	YNL126W		YDL179W
YOR374W		YMR204C	YMR076C	YGR108W	YJR076C	YGR284C		YKL043W
YGR074W		YMR213W	YML066C	YEL077C	YPL227C	YBR198C		YCL014W
YLR304C		YMR224C	YDL157C	YPL023C	YDR391C	YHR127W		YBR152W
YLR348C		YMR227C	YFL008W	YIL167W	YGR286C	YER150W		YGL184C
YFL010C		YMR236W	YNL165W	YFR026C	YOL011W	YLR236C		YHR097C
YPL032C		YMR262W	YLR343W	YOR207C	YDR369C	YKR089C		YOR382W
YJR148W		YMR273C	YHL040C	YPR101W	YGR269W	YJR154W		YLR116W
YGL216W		YMR276W	YCL062W	YCR037C	YOL155C	YGL257C		YMR003W
YOL158C		YMR284W	YIL025C	YAR018C	YGL217C	YFL042C		YJL116C
YIL158W		YMR294W	YNL273W	YMR076C	YLR235C	YKL127W		YJR093C
YDR400W		YMR299C	YOR313C	YOR390W	YOL147C	YBR094W		YML128C
YPR127W		YNL001W	YGR234W	YOL019W	YGR176W	YKR063C		YIL079C
YPR131C		YNL007C	YLR380W	YIL026C	YOR050C	YMR145C		YLR254C
YPR135W		YNL012W	YDR488C	YPR193C	YNL141W	YBR161W		YJL218W
YGR108W		YNL020C	YKL089W	YNL263C	YOR229W	YDR516C		YPL036W
YOR145C		YNL025C	YLR437C	YDR356W	YMR096W	YDL094C		YDR346C
YOR153W		YNL053W	YDR302W	YMR145C	YDL024C	YMR072W		YPL092W
YOR195W		YNL064C	YER145C	YLR351C	YKR090W	YCL065W		YNL293W
YKL084W		YNL068C	YPL075W	YLR313C	YDL102W	YDR514C		YFL042C
YHR143W		YNL078W	YOL101C	YOL076W	YMR290C	YAL015C		YGL207W
YPL135W		YNL082W	YBL052C	YPR076W	YGR177C	YDL009C		YHR123W
YFL029C		YNL084C	YBR242W	YOL123W	YBR142W	YCR095C		YKL218C
YHR149C		YNL098C	YIL122W	YGL175C	YOR152C	YGR071C		YLL061W
YER010C		YNL110C	YGL090W	YJL073W	YKL130C	YPL074W		YLR214W
YHR151C		YNL116W	YDR261C	YDR518W	YBR056W	YMR013C		YHR215W
YGL037C		YNL126W	YFL011W	YDL135C	YDR191W	YJL019W		YFR053C
YNR055C		YNL127W	YEL042W	YOR307C	YPR141C	YCL034W		YDR302W
YBR216C		YNL153C	YIL104C	YJL105W	YMR105C	YLR254C		YJL015C
YBR067C		YNL154C	YKL004W	YLR467W	YBR254C	YLR281C		YBR133C
YBR069C		YNL161W	YLR254C	YIL168W	YJL201W	YER064C		YER170W
YPL039W		YNL164C	YNL263C	YNL048W	YLR270W	YIR034C		YBL016W
YBR071W		YNL166C	YBL064C	YBR243C	YDR480W	YKL066W		YOL069W
YER059W		YNL172W	YGL037C	YHR178W	YAL025C	YCR069W		YBL028C
YPL041C		YNL188W	YLR209C	YDR440W	YHL048W	YBL029W		YLR098C
YKL036C		YNL192W	YOL012C	YDR303C	YMR007W	YFL061W		YER124C
YNL300W		YNL196C	YGL061C	YLR300W	YMR315W	YER034W		YIL139C
YLR413W		YNL204C	YER150W	YLR032W	YDR330W	YDR480W		YOL158C
YHR104W		YNL210W	YJR043C	YGL212W	YJL196C	YOR294W		YOL124C
YDR451C		YNL216W	YPL209C	YGL185C	YLR110C	YOR126C		YDR191W
YPR138C		YNL225C	YHR094C	YIL144W	YNL190W	YKR103W		YDL127W
YCR061W		YNL233W	YPR128C	YBR252W	YBL028C	YCR075C		YJR010W
YIR038C		YNL242W	YFL060C	YJL112W	YOR033C	YIL074C		YIR002C
YCR065W		YNL246W	YKR021W	YNL176C	YDR193W	YJL034W		YPL007C
YMR184W		YNL250W	YBR161W	YER108C	YER059W	YDL027C		YOL155C
YOL012C		YNL262W	YJL072C	YKL089W	YDR436W	YGL241W		YIL080W
YDR461W		YNL267W	YGR284C	YGL059W	YDR021W	YMR278W		YGL028C
YMR295C		YNL271C	YNL043C	YPR162C	YEL060C	YER046W		YLR149C
YEL017W		YNL273W	YGR113W	YKL096W-A	YOL016C	YEL061C		YBR230C
YOR161C		YNL289W	YLR040C	YER011W	YLR383W	YML107C		YHR188C
YAL023C		YNL290W	YJR054W	YKL185W	YKR098C	YLL001W		YNL042W
YMR303C		YNL292W	YMR048W	YOR188W	YCL030C	YJL176C		YPR075C
YGL055W		YNL298W	YJL137C	YLR112W	YDR150W	YDR222W		YCL055W
YJL109C		YNL299W	YIL138C	YGL038C	YHR092C	YKL096W		YDL038C
YMR305C		YNL307C	YJL196C	YPR140W	YOL156W	YGL093W		YML012W
YOR165W		YNL309W	YOR230W	YNR044W	YPL093W	YOL016C		YLL033W
YGR092W		YNL327W	YLR236C	YKR042W	YGL028C	YJR137C		YPL207W
YJL147C		YNR010W	YCL042W	YOR103C	YMR049C	YER016W		YBL069W
YOR203W		YNR067C	YOR144C	YEL032W	YJL097W	YOR119C		YJL194W
YOR205C		YOL006C	YBR094W	YLR270W	YPL207W	YML001W		YBL080C
YEL065W		YOL021C	YLR099C	YGR099W	YMR300C	YGR146C		YDR518W
YAR003W		YOL034W	YPL232W	YHR123W	YNL065W	YJR071W		YLR223C
YDL093W		YOL069W	YBR069C	YER149C	YGL200C	YHL046C		YPL222W
YGR172C		YOL076W	YFL066C	YGR042W	YHR126C	YIL009W		YGL022W
YDL095W		YOL080C	YJR003C	YJR053W	YLL008W	YML061C		YIL118W
YGR176W		YOL090W	YKR046C	YJR134C	YNL113W	YOR132W		YGR172C
YJL157C		YOL091W	YBR296C	YKL042W	YEL047C	YJL217W		YHR092C
YLL032C		YOL094C	YCL040W	YBL063W	YML125C	YAL012W		YKL029C
YKL096W		YOL104C	YPR167C	YML038C	YAL007C	YBL098W		YER091C
YPL145C		YOL113W	YML123C	YKR078W	YNR038W	YPL141C		YMR270C
YKL096W-A		YOL115W	YHR146W	YKL049C	YJL218W	YLL033W		YGL094C
YKL099C		YOL133W	YMR183C	YGR023W	YJL017W	YML085C		YBR243C
YPL149W		YOL139C	YNL166C	YNL102W	YCL062W	YNL174W		YDR085C
YKL101W		YOL145C	YFR027W	YNR028W	YDL035C	YDR149C		YBR135W
YNR023W		YOR005C	YHR173C	YKL029C	YJL137C	YMR015C		YLR058C
YPL155C		YOR026W	YKL209C	YMR030W	YBL054W	YGR289C		YOR220W
YGL163C		YOR028C	YGR276C	YOL112W	YJR002W	YLR273C		YDR515W
YNL058C		YOR038C	YDR493W	YPL247C	YDL222C	YMR277W		YNR055C
YKL185W		YOR039W	YHR113W	YDL117W	YJL034W	YPL014W		YER059W
YOR247W		YOR054C	YMR144W	YPL133C	YBR120C	YGL061C		YCL027W
YEL077C		YOR057W	YNL181W	YHR075C	YMR002W	YKL202W		YDL024C
YHR061C		YOR058C	YOR258W	YDR130C	YDL049C	YOR391C		YEL064C
YKL003C		YOR061W	YJL067W	YNL134C	YKR099W	YKL089W		YIL082W
YIL066C		YOR073W	YGL200C	YKL164C	YBR143C	YGL008C		YLR423C
YNL260C		YOR083W	YLR100W	YDR016C	YGR172C	YMR216C		YGL083W
YHR063C		YOR101W	YJL092W	YMR105C	YGL216W	YIL120W		YHR050W
YKR004C		YOR119C	YPL054W	YCL061C	YIL155C	YLR238W		YOL109W
YLR373C		YOR149C	YIL162W	YLR251W	YLR149C	YER135C		YJL078C
YPL053C		YOR156C	YBR139W	YDL155W	YIL103W	YGL075C		YLR437C
YLR375W		YOR177C	YPR014C	YMR253C	YKL191W	YGL200C		YHR135C
YNL264C		YOR178C	YNL172W	YBR042C	YIL119C	YDR308C		YJL017W
YDR087C		YOR181W	YDL156W	YFR039C	YJR054W	YLR209C		YGR071C
YKL008C		YOR195W	YLL012W	YJL093C	YOR145C	YFR046C		YOL070C
YPL057C		YOR198C	YFL065C	YHL018W	YGR159C	YLR376C		YCR102C
YBR088C		YOR208W	YDL197C	YMR008C	YDR358W	YLR136C		YDR022C
YDR089W		YOR213C	YLR098C	YOR152C	YLL033W	YLR079W		YKL128C
YFL037W		YOR217W	YOL119C	YBL105C	YCL031C	YOR023C		YNL190W
YKR010C		YOR229W	YOR052C	YNL123W	YLL051C	YLR458W		YER153C
YLR379W		YOR230W	YCL027W	YDL102W	YNL175C	YBL004W		YBR214W
YPL059W		YOR231W	YJL158C	YBR083W	YJL084C	YGR031W		YFL044C
YKR012C		YOR244W	YKR069W	YBL086C	YEL061C	YIL094C		YOR383C
YOR297C		YOR249C	YOR126C	YLR182W	YPL241C	YGR065C		YML047C
YPL097W		YOR257W	YOR321W	YJL134W	YIR002C	YLR188W		YFR014C
YHR108W		YOR265W	YHR106W	YCR083W	YNL200C	YBL064C		YNL176C
YHR110W		YOR269W	YLR225C	YDR219C	YJL044C	YMR106C		YGR055W
YKL052C		YOR272W	YBR256C	YPR119W	YBR051W	YML066C		YBR052C
YCL055W		YOR298W	YDR337W	YOR126C	YFL060C	YMR022W		YHR108W
YDR133C		YOR313C	YDR380W	YER130C	YMR008C	YGL184C		YBR056W
YNL312W		YOR349W	YFR002W	YML034W	YDR530C	YML050W		YGL097W
YPL233W		YOR351C	YPL095C	YPL075W	YNL176C	YAL042W		YDL102W
YKL056C		YOR361C	YNL197C	YER114C	YNL112W	YNL054W		YNL276C
YKL058W		YOR368W	YOL034W	YLR201C	YDR261C	YGR277C		YIR019C
YNL316C		YOR372C	YGR238C	YER078C	YHR071W	YGR238C		YIL155C
YOL030W		YOR373W	YNL304W	YLR457C	YNL328C	YLL062C		YDR149C
YJL002C		YPL008W	YOL011W	YKL053W	YMR094W	YIL161W		YLR345W
YMR188C		YPL011C	YML110C	YOR179C	YAL012W	YNR052C		YMR300C
YJL004C		YPL018W	YNL225C	YBR086C	YLR267W	YKL033W		YDL039C
YOL069W		YPL020C	YPL264C	YGR001C	YDR518W	YNL272C		YML096W
YJL006C		YPL024W	YOR250C	YJR137C	YIL082W	YJR084W		YKL130C
YLL058W		YPL031C	YCRX05W	YDR147W	YOR372C	YKR081C		YDR369C
YPR156C		YPL033C	YDL089W	YGR176W	YDL177C	YCR091W		YNL037C
YJR010W		YPL042C	YLR056W	YPR111W	YFR035C	YNR059W		YDL132W
YGR030C		YPL046C	YPL025C	YJL225C	YPR112C	YCL061C		YOR145C
YOR025W		YPL055C	YDL169C	YOR270C	YPL269W	YPL156C		YDR006C
YGR256W		YPL121C	YIL144W	YML079W	YGR238C	YDL093W		YBR068C
YLR033W		YPL124W	YAL067C	YMR070W	YOR128C	YKL079W		YLR178C
YPR198W		YPL126W	YFR030W	YGL061C	YJR053W	YDR440W		YLR438W
YPR202W		YPL129W	YMR202W	YGR017W	YAR003W	YMR064W		YOR152C
YCRX18C		YPL130W	YHR154W	YML072C	YAL028W	YGR089W		YLR258W
YMR246W		YPL139C	YHR123W	YLR045C	YDR307W	YDL096C		YPL241C
YJL059W		YPL140C	YHR030C	YPR021C	YJR003C	YOR228C		YFR035C
YMR250W		YPL152W	YLR457C	YOR060C	YMR253C	YPL112C		YDR193W
YDR521W		YPL153C	YPR107C	YLR099C	YBR149W	YJL158C		YOR104W
YLR043C		YPL155C	YPR045C	YCRX05W	YKL189W	YLR210W		YML131W
YPL221W		YPL174C	YOR235W	YOR081C	YKL078W	YJL094C		YML125C
YMR307W		YPL178W	YBR204C	YOR023C	YNL274C	YDR279W		YMR163C
YDL055C		YPL194W	YLR050C	YCR091W	YMR189W	YGR086C		YLR460C
YJL115W		YPL200W	YOR355W	YPR099C	YML101C	YIR042C		YGL162W
YMR315W		YPL204W	YCR069W	YBR077C	YDL023C	YHR106W		YDR501W
YJL159W		YPL209C	YBR273C	YHL020C	YBR133C	YEL005C		YNL334C
YNL030W		YPL233W	YNL216W	YBR276C	YGL126W	YBR243C		YJL217W
YNL036W		YPL239W	YJR155W	YKR001C	YMR075W	YLR099C		YDR285W
YNL038W		YPL240C	YGR240C	YKL008C	YGR243W	YHR178W		YDL094C
YPL163C		YPL241C	YMR295C	YPL175W	YHR135C	YJL060W		YNL208W
YHR173C		YPL242C	YKL104C	YGR191W	YJL125C	YJR012C		YJR002W
YER124C		YPL255W	YLR214W	YGR089W	YDR501W	YPL032C		YNL118C
YHR215W		YPL256C	YGL185C	YLR159W	YER053C	YNL197C		YJL034W
YHR219W		YPL268W	YNL276C	YBL111C	YOL014W	YKL090W		YOR317W
YKL163W		YPL269W	YLL061W	YNL053W	YDR040C	YPR157W		YIL132C
YKL191W		YPR007C	YIL011W	YIR030C	YGL097W	YPL221W		YOL079W
YOR251C		YPR018W	YPL014W	YNL152W	YNL046W	YOL070C		YOR084W
YNL068C		YPR019W	YOR105W	YBL031W	YER061C	YDL150W		YJR054W
YOR253W		YPR025C	YPR138C	YOR256C	YNL220W	YDR205W		YEL024W
YBR033W		YPR046W	YGL195W	YDR149C	YGL162W	YJR112W		YJL033W
YHR071W		YPR055W	YKR103W	YFR028C	YNL290W	YLR373C		YDR021W
YNL070W		YPR075C	YAL053W	YBR038W	YCL063W	YNL303W		YOL149W
YBR093C		YPR078C	YNL072W	YKL052C	YHR086W	YKR098C		YKL191W
YKL201C		YPR082C	YHR098C	YHR006W	YHR113W	YPR137W		YHR159W
YNL276C		YPR103W	YJL091C	YOR070C	YJR136C	YDR249C		YBL052C
YNL116W		YPR111W	YHR029C	YMR277W	YNL278W	YKL106W		YML118W
YBR035C		YPR119W	YIL074C	YGR015C	YHR153C	YDR013W		YGR237C
YNL118C		YPR120C	YOL058W	YBR053C	YFR034C	YNL082W		YDR204W
YOR303W		YPR135W	YML116W	YDL037C	YLR345W	YLL063C		YOR347C
YBR139W		YPR141C	YDR545W	YGR086C	YNL116W	YOR077W		YPR124W
YNL120C		YPR161C	YLR302C	YCL023C	YBR138C	YKL053W		YCR030C
YOR305W		YPR188C	YDL105W	YLR234W	YBL071C	YLR246W		YLR115W
YPL111W			YMR246W	YLR357W	YML012W	YKR090W		YAR003W
YKR022C			YPL250C	YOL114C	YDL169C	YHR135C		YKL111C
YOR307C			YDR011W	YOR137C	YBR126C	YKL039W		YKL132C
YPL113C			YCLX09W	YPL025C	YEL016C	YLR159W		YER061C
YCL063W			YPL255W	YDR085C	YMR243C	YKL063C		YBL039C
YHR126C			YML065W	YJL019W	YBL020W	YIL023C		YML053C
YPL241C			YDL128W	YGR055W	YIR026C	YBL061C		YMR189W
YDR149C			YLR058C	YFL049W	YHR214W	YER151C		YPL247C
YLR179C			YIR036C	YJR055W	YOR176W	YOR024W		YHR098C
YML111W			YOR337W	YNL003C	YAL061W	YPL258C		YHR104W
YMR202W			YJR001W	YFR006W	YKL109W	YLR115W		YDR354W
YML113W			YJR110W	YFL061W	YBR152W	YIL045W		YJR040W
YJL201W			YMR254C	YPR204W	YOR084W	YBR049C		YNL048W
YLR183C			YCL038C	YLR376C	YKL178C	YML109W		YAR073W
YDR481C			YPR160W	YLR154C	YML118W	YMR313C		YJL079C
YLR003C			YIL094C	YBR008C	YPR075C	YAR002W		YIR043C
YDR281C			YNL056W	YJR092W	YGL157W	YHR146W		YCR026C
YCR024C-A			YCR018C	YPR183W	YKL148C	YLL005C		YER122C
YPR170C			YIL135C	YML131W	YER170W	YBR043C		YJL072C
YDR319C			YLR032W	YOR119C	YDL011C	YIL162W		YGL008C
YGR044C			YLR465C	YFL057C	YOR233W	YKR001C		YGR044C
YDL003W			YEL025C	YFL051C	YHL028W	YBL051C		YDR249C
YJR020W			YIL117C	YOL016C	YDR308C	YER042W		YDL035C
YLR229C			YDL010W	YML064C	YML102W	YDR088C		YLL031C
YMR031C			YNL003C	YMR054W	YDL094C	YJL186W		YBR204C
YLR049C			YNL173C	YOR105W	YBL088C	YPR075C		YDL023C
YDL009C			YDL095W	YFL017C	YNL173C	YKL065C		YMR054W
YGR142W			YML050W	YIR023W	YHR079C	YDR004W		YOL008W
YJL125C			YEL060C	YGR277C	YOR388C	YHR074W		YPR076W
YGL021W			YJR154W	YOR176W	YLR379W	YAL043C		YCL030C
YOR185C			YOL014W	YDL039C	YBL083C	YDR428C		YOR372C
YNL002C			YDR346C	YHR159W	YAL018C	YKL096W-A		YPL075W
YOR187W			YIL114C	YOL135C	YGR143W	YBR069C		YLR225C
YOR189W			YPL221W	YBR007C	YBR187W	YKL057C		YMR290C
YGR190C			YML035C-A	YHR122W	YIL169C	YLR338W		YDR480W
YJL171C			YHR205W	YMR001C	YFR026C	YOR113W		YGR042W
YJL173C			YML020W	YLR030W	YGL093W	YCR043C		YOR240W
YNL044W			YNR066C	YPR172W	YBR073W	YBR204C		YIL147C
YOR229W			YKL151C	YPR013C	YLR304C	YDL105W		YOL016C
YJL175W			YOL114C	YDR183W	YGL083W	YML117W		YBL054W
YOR231W			YOR342C	YBR278W	YNL174W	YOR346W		YOL156W
YNL048W			YGL209W	YLR303W	YER042W	YDR151C		YGR176W
YOR233W			YGR146C	YOL094C	YKL009W	YOR319W		YMR008C
YOR237W			YPL265W	YGL201C	YML064C	YML023C		YDR020C
YHR177W			YLR169W	YLR209C	YOR137C	YFL036W		YDR391C
YHR181W			YBL100C	YGR171C	YPL123C	YDR545W		YJL196C
YBR202W			YOR049C	YJL051W	YNL225C	YFR017C		YAL025C
YML033W			YBR087W	YNL310C	YEL024W	YNL304W		YPR141C
YPL175W			YOR127W	YGL028C	YKR081C	YKR042W		YPR168W
YKL127W			YNR050C	YBR275C	YDR125C	YLR225C		YAL012W
YDR261C			YHR172W	YAR068W	YPL012W	YDR288W		YGR177C
YKL167C			YOL088C	YDR094W	YGR008C	YLR138W		YOR050C
YLR391W			YDR432W	YML029W	YPL075W	YDR126W		YDR122W
YOL020W			YOL016C	YDL048C	YOR104W	YNL117W		YOR326W
YPL227C			YOR317W	YCRX21C	YDR122W	YHR123W		YDR308C
YIL107C			YNL171C	YLR119W	YOR146W	YBL036C		YNL141W
YLR395C			YDR342C	YJL106W	YMR095C	YKL171W		YKR099W
YNL284C			YDR448W	YOR298W	YLR326W	YGL170C		YDR150W
YPL075W			YDR307W	YGL131C	YOR317W	YCR062W		YLR242C
YBL110C			YML100W	YDR073W	YMR274C	YKL183W		YOR319W
YNL078W			YJL099W	YMR144W	YBR041W	YOR104W		YMR028W
YHR086W			YEL064C	YEL066W	YLR438W	YNL171C		YCL063W
YBL112C			YFR015C	YNL077W	YKL099C	YJL073W		YCL062W
YKL030W			YOR075W	YGR022C	YBR139W	YIL090W		YBR120C
YKL209C			YLR458W	YPL064C	YGL263W	YHR151C		YMR049C
YHR134W			YNL111C	YPR167C	YPR184W	YPL253C		YDR058C
YNL126W			YPL111W	YDR353W	YMR277W	YHR173C		YLR383W
YKL076C			YML021C	YPL141C	YBR184W	YOL011W		YBR130C
YKL078W			YGL212W	YGR252W	YAL059W	YJR148W		YDL177C
YGL201C			YML120C	YIL082W	YHR007C	YNR004W		YHR205W
YOR315W			YHR006W	YBR138C	YEL074W	YMR036C		YMR105C
YNR001C			YHR127W	YCR040W	YNL304W	YPR004C		YMR039C
YNL134C			YKL065C	YJR138W	YDL186W	YBR007C		YLR110C
YMR214W			YLR151C	YNL303W	YIL124W	YKR091W		YDL222C
YPR174C			YCL066W	YPL232W	YNL334C	YMR148W		YDR030C
YOR321W			YKL044W	YOL138C	YOL115W	YML082W		YMR284W
YMR216C			YDR461W	YLR057W	YNL212W	YNL241C		YPL015C
YML121W			YGL225W	YJL067W	YER130C	YDR314C		YDL169C
YPR178W			YHR108W	YDL124W	YML008C	YDR297W		YIL119C
YML123C			YDL011C	YHR179W	YCR005C	YGL009C		YMR315W
YJL034W			YOR083W	YLR240W	YJL195C	YDR351W		YNL313C
YDL015C			YGR153W	YDL068W	YOL069W	YJL119C		YMR095C
YMR270C			YGR260W	YOR315W	YDL022W	YEL028W		YPR111W
YJL079C			YMR055C	YCL066W	YKR040C	YDR219C		YLR057W
YLR061W			YER149C	YFR037C	YJL172W	YLR035C		YOR176W
YMR272C			YHR092C	YLR272C	YIL118W	YKL004W		YKR004C
YLR065C			YLR013W	YOR255W	YMR216C	YDL204W		YCR008W
YMR277W			YML117W	YMR064W	YDR249C	YOR217W		YHL047C
YAR071W			YKR079C	YPL091W	YNL206C	YHR044C		YKL078W
YDL127W			YOR332W	YOL011W	YJR001W	YDL068W		YCL031C
YPR028W			YGL032C	YDR325W	YBR094W	YDR307W		YOR175C
YBL002W			YOR152C	YNL334C	YDR488C	YJL201W		YMR007W
YIL129C			YPR013C	YDR527W	YBR001C	YJR144W		YNL290W
YCL012W			YFL044C	YCL034W	YOL103W	YPR162C		YEL060C
YBR009C			YPR034W	YOL057W	YCR033W	YER019W		YPL093W
YHL050C			YOL150C	YGR166W	YDR022C	YJL183W		YPR101W
YNL090W			YOR283W	YDR348C	YGR255C	YFL011W		YNL113W
YNL092W			YOR129C	YLR212C	YDL089W	YFL060C		YNL326C
YOR277C			YCL043C	YBR274W	YFR015C	YKR061W		YNR038W
YKL219W			YLR372W	YIL119C	YMR258C	YOR287C		YOR127W
YNL094W			YGR219W	YER042W	YBR162C	YDR244W		YEL031W
YKL221W			YLR288C	YLR118C	YMR131C	YJL076W		YNL328C
YOR393W			YBL030C	YLL038C	YKL042W	YLR347C		YCL074W
YOR285W			YDR001C	YNL327W	YNL326C	YEL016C		YCR033W
YIL103W			YHR067W	YNL054W	YNR023W	YNL166C		YML061C
YNL138W			YDR368W	YGL246C	YIL009W	YMR243C		YGR258C
YOR327C			YBR007C	YLR202C	YOR206W	YIL110W		YNL065W
YDR361C			YDL180W	YML127W	YBR123C	YBR287W		YGR113W
YKR044W			YKL182W	YER091C	YKL052C	YKL215C		YJL099W
YIL123W			YBR287W	YDR199W	YDL124W	YIL117C		YBR086C
YMR076C			YBR133C	YHR038W	YOL002C	YOR079C		YHR214W
YIL111W			YOR372C	YPR189W	YOR381W	YDL210W		YGL014W
YOL125W			YDR144C	YBL097W	YOR326W	YDL039C		YLR153C
YDR365C			YFL006W	YHR022C	YAR068W	YLR182W		YAL028W
YMR078C			YJL015C	YBL113C	YGL078C	YDL102W		YBR126C
YCR002C			YBR053C	YNL262W	YLR225C	YJL126W		YBR123C
YMR002W			YGR065C	YPR165W	YGR160W	YIL097W		YOR132W
YDR297W			YOR104W	YOR274W	YNR053C	YJL083W		YEL047C
YOR001W			YCR002C	YPL259C	YBR086C	YHR217C		YFL061W
YOL059W			YOL132W	YOR025W	YOR230W	YPL021W		YNL165W
YMR007W			YOL094C	YJR083C	YEL064C	YDL080C		YKL079W
YPL269W			YNL208W	YER120W	YNL165W	YCL025C		YKL099C
YGR244C			YPL133C	YER158C	YDR178W	YML093W		YNL274C
YJR001W			YIL076W	YML130C	YOL112W	YBR087W		YNL175C
YMR009W			YHR178W	YGR206W	YCL074W	YDR363W		YDL238C
YPR098C			YJR048W	YCR041W	YGL034C	YDR259C		YBR143C
YJR003C			YNL169C	YJL113W	YPL066W	YNL091W		YNL298W
YLR209C			YNL326C	YML119W	YDR346C	YEL024W		YDR002W
YPR100W			YDR190C	YCR106W	YOR377W	YOR049C		YMR131C
YMR011W			YPR155C	YPL174C	YHR159W	YIL167W		YDR356W
YGR286C			YFL026W	YJL123C	YBR182C	YOR083W		YKL189W
YMR054W			YLR135W	YJL013C	YKR024C	YBR013C		YDL234C
YJR044C			YOR270C	YNR016C	YNL043C	YGL083W		YBL083C
YMR058W			YKL183W	YHL046C	YBL052C	YGR140W		YOR129C
YPR034W			YLR347C	YIL009W	YIL132C	YGL239C		YMR002W
YJR048W			YNL231C	YLR079W	YBL072C	YDR355C		YLR034C
YOL111C			YDR029W	YPL013C	YLR401C	YIL025C		YGR243W
YPR038W			YLR233C	YML066C	YDR460W	YBR192W		YOR128C
YLR259C			YMR278W	YJR060W	YNL118C	YOL158C		YGR159C
YGL101W			YOL112W	YCL027W	YDR020C	YPR022C		YMR243C
YDL207W			YGL125W	YBR157C	YGL012W	YMR060C		YBR297W
YJR076C			YGR259C	YJR110W	YDR373W	YGR226C		YLR379W
YOR357C			YOR023C	YPL057C	YJR070C	YGL032C		YHR113W
YLR321C			YHR022C	YPL074W	YLR437C	YGL203C		YJL125C
YJR117W			YOR115C	YER041W	YLR381W	YCRX04W		YOR188W
YPL007C			YDR053W	YJL072C	YLL034C	YNL072W		YOR036W
YDR367W			YDR157W	YNL058C	YJR147W	YKL049C		YBL088C
YMR083W			YIL121W	YOR208W	YBL014C	YCR037C		YJR136C
YMR087W			YDL048C	YER018C	YKL203C	YLR098C		YOL014W
YKR068C			YDR276C	YCR082W	YDR002W	YCR002C		YJR001W
YPR062W				YJL052W		YNL250W
YMR134W				YDL086W		YMR026C
YOR013W				YOR045W		YMR016C
YPR104C				YOR016C		YKL201C
YIR002C				YOR047C		YIL082W
YPR106W				YPL152W		YJL112W
YLL012W				YGR275W		YEL066W
YPR110C				YJR128W		YLR020C
YLL014W				YNR030W		YJL044C
YPR112C				YJR145C		YLR278C
YBL016W				YJR148W		YDR501W
YLR343W				YDL038C		YBR152W
YIL141W				YFR016C		YLR041W
YOL147C				YOR094W		YMR058W
YMR105C				YKR049C		YPR141C
YOL151W				YML109W		YHR113W
YPR076W				YBR103W		YOL079W
YPR120C				YHR023W		YGL070C
YPR124W				YPL213W		YIL122W
YBL030C				YCR022C		YKL035W
YBL032W				YMR032W		YHL032C
YER061C				YNL086W		YPR196W
YBL082C				YDL141W
YBR296C				YDL158C
YHL040C				YNL289W
YJR093C				YER159C
YLR299W				YGR074W
YLR301W				YMR090W
YLR303W				YJR144W
YJR139C				YDR445C
YLR347C				YKL179C
YJR143C				YMR067C
YPL029W				YDR480W
YPL031C				YIL157C
YJR149W				YKR037C
YKR088C				YGR025W
YPR080W				YMR055C
YPR082C				YDR146C
YIL157C				YBR277C
YKR092C				YGL126W
YOL159C				YPL162C
YMR115W				YAL022C
YPR086W				YLL021W
YIR022W				YIL106W
YPR128C				YIL162W
YOR039W				YOR027W
				YPL082C
				YLR097C
				YKL220C
				YNL199C
				YHR113W
				YDR399W
				YPL258C
				YNL328C
				YGL116W
				YNR059W
				YPL095C
				YAL039C
				YDL170W
				YLR072W
				YDR460W
				YJR147W
				YLR190W
				YPL092W
				YNL078W
				YDL127W
				YOR331C
				YCRX04W
				YGR028W
				YAR028W
				YOL035C
				YIR042C
				YDR318W
				YDR192C
				YPL242C
				YJL139C
				YPR025C
				YGR260W
				YJL194W
				YPR091C
				YHL008C
				YBL034C
				YIL076W
				YHL004W
				YLR246W
				YHR064C
				YLR014C
				YML042W
				YJL078C
				YDL144C
				YOR190W
				YLR252W
				YMR196W
				YNL211C
				YNL171C
				YCR024C-A
				YKR021W
				YLR174W
				YGR129W
				YHR001W
				YOL153C
				YPL036W
				YNL277W
				YPR048W
				YOR228C
				YPR159W
				YOR251C
				YPL264C
				YOR031W
				YBL107C
				YOL083W
				YMR137C
				YGR205W
				YBR229C
				YLR156W
				YJR054W
				YNR067C
				YJL195C
				YDR484W
				YML117W
				YMR305C
				YPL016W
				YDR511W
				YJR058C
				YNL293W
				YDL180W
				YGL114W
				YNL055C
				YMR042W
				YOR385W
				YHR158C
				YNL235C
				YMR299C
				YOR058C
				YIL159W
				YOR283W
				YOR007C
				YLL062C
				YNL242W
				YNL217W
				YMR150C
				YGR177C
				YPR017C
				YBR073W
				YGR179C
				YMR034C
				YDL240W
				YGR196C
				YGL190C
				YBL074C
				YLR368W
				YOR113W
				YGL008C
				YIL056W
				YOR288C
				YOR035C
				YOR143C
				YCR085W
				YMR048W
				YKR023W
				YLR386W
				YBL061C
				YOR337W
				YFL013C
				YMR005W
				YOR308C
				YHR030C
				YGL060W
				YPL158C
				YDR314C
				YLL005C
				YKL022C
				YKL130C
				YGL262W
				YJR112W
				YOR323C
				YDR034C
				YDL237W
				YFL034C-B
				YGL064C
				YOL151W
				YDL106C
				YOR174W
				YOR285W
				YPR141C
				YLR121C
				YOL033W
				YGR140W
				YHL028W
				YDR208W
				YMR035W
				YLR288C
				YGR273C
				YLR302C
				YIR037W
				YPR164W
				YLR286C
				YHR060W
				YDR033W
				YHR150W
				YDL043C
				YGR170W
				YDR532C
				YGR033C
				YMR088C
				YGR116W
				YDR522C
				YDR049W
				YHR058C
				YOR191W
				YLR417W
				YDR131C
				YEL053C
				YJL042W
				YPL274W
				YPR072W
				YOR329C
				YHR183W
				YDR098C
				YER145C
				YGR047C
				YBR054W
				YGR097W
				YDL028C
				YPL052W
				YGL125W
				YLR353W
				YAL024C
				YKL001C
				YDR281C
				YGL203C
				YOR185C
				YPR155C
				YGL129C
				YCL065W
				YLR458W
				YIL149C
				YOR241W
				YPL129W
				YKL129C
				YIR017C
				YKL106W
				YGL255W
				YBL029W
				YBR261C
				YNR008W
				YOL154W
				YDL225W
				YDR267C
				YMR265C
				YPR022C
				YNL038W
				YJL168C
				YJR114W
				YLL017W
				YFR031C
				YPR002W
				YJL022W
				YGR044C
				YBR046C
				YPR042C
				YJR074W
				YKL127W
				YDR201W
				YDR313C
				YOL136C
				YOL105C
				YOR324C
				YIL104C
				YIL065C
				YKL026C
				YLR010C
				YPL046C
				YDR459C
				YOL155C
				YJL160C
				YIL135C
				YDR286C
				YOL066C
				YDR200C
				YMR318C
				YNR037C
				YGR284C
				YMR238W
				YPR071W
				YHR175W
				YNR010W
				YHR119W
				YKL020C
				YOR219C
				YIR006C
				YER062C
				YDR357C
				YJR032W
				YLR219W
				YLR160C
				YEL059C-A
				YEL076C-A
				YER093C-A
				YFR024C-A
				YIL074C
				YML021C
				YML035C-A
				YML052W
				YML085C
				YML133C
