# Supplementary material for: Principal-Oscillation-Pattern Analysis of Gene Expression
Source: PLoS One. 2012 Jan 10;7(1):e28805. doi: 10.1371/journal.pone.0028805 (PMC3254616; doi:10.1371/journal.pone.0028805)
Supplement: Table S6 — POP amplitudes and phases of all 4774 genes in Dataset alpha 30, http://labs.fhcrc.org/breeden/cellcycle/ . (XLS) [file pone.0028805.s010.xls]

## Sheet: Sheet1
Table S6. POP amplitudes and phases of all 4774 genes in Dataset alpha 30, http://labs.fhcrc.org/breeden/cellcycle/
Gene (30_compilation)	POP amplitude	POP phase (degree)
YAL001C	0.00451577	214.605
YAL002W	0.0186995	238.944
YAL003W	0.0126908	158.786
YAL004W	0.0292736	201.173
YAL005C	0.0407547	186.099
YAL007C	0.028213	217.412
YAL009W	0.00652875	44.4133
YAL010C	0.0113075	45.2232
YAL012W	0.00738636	177.524
YAL017W	0.0487545	217.489
YAL018C	0.0240239	320.218
YAL020C	0.00887411	173.798
YAL021C	0.00652134	247.41
YAL022C	0.0308516	19.8498
YAL023C	0.0257049	214.958
YAL024C	0.0464273	213.227
YAL025C	0.0259401	158.065
YAL027W	0.00675615	41.2216
YAL029C	0.0108332	101.307
YAL031C	0.00860846	19.5002
YAL032C	0.0182025	103.669
YAL033W	0.0274862	133.64
YAL034C	0.0259271	177.405
YAL034W-A	0.0421818	239.703
YAL035W	0.00843507	94.0312
YAL036C	0.0157395	110.154
YAL037W	0.0290961	353.474
YAL039C	0.0402875	45.3025
YAL040C	0.0478196	33.6053
YAL041W	0.0176544	68.7327
YAL042W	0.00188884	132.79
YAL043C	0.0171633	52.6029
YAL043C-A	0.0170641	330.742
YAL044C	0.0296965	103.905
YAL045C	0.0116268	213.462
YAL046C	0.00366605	65.5155
YAL047C	0.0161048	251.858
YAL048C	0.00480302	193.562
YAL049C	0.0198375	358.986
YAL053W	0.0332323	253.73
YAL054C	0.013595	334.954
YAL055W	0.0116409	35.3893
YAL058C-A	0.0115328	21.4625
YAL058W	0.0108242	325.027
YAL059W	0.0384516	134.802
YAL060W	0.0137469	331.839
YAL061W	0.0114409	34.5141
YAL062W	0.0307424	339.205
YAL063C	0.00381446	184.896
YAL064C-A	0.0246598	298.703
YAL064W-B	0.0180939	153.295
YAL065C	0.0135343	97.4819
YAL067C	0.0488701	268.181
YAL068C	0.028512	283.245
YAL069W	0.0181938	266.534
YAR002C-A	0.0187337	180.167
YAR003W	0.0321203	277.713
YAR007C	0.0971233	276.072
YAR008W	0.048485	271.597
YAR009C	0.029709	264.255
YAR010C	0.0513142	265.091
YAR015W	0.0131649	301.196
YAR018C	0.0751343	49.4385
YAR019C	0.0181444	68.8843
YAR020C	0.0185977	107.517
YAR023C	0.000765551	183.084
YAR027W	0.0110957	348.429
YAR028W	0.0272608	207.238
YAR029W	0.0141039	185.623
YAR030C	0.0115946	201.725
YAR035W	0.0272717	230.654
YAR042W	0.0259411	310.479
YAR044W	0.00796059	303.77
YAR050W	0.0106052	138.016
YAR060C	0.0188892	310.447
YAR062W	0.014138	238.93
YAR064W	0.00956866	285.664
YAR066W	0.0112367	278.403
YAR068W	0.015574	258.268
YAR071W	0.0437845	6.96657
YAR073W	0.0352832	145.425
YAR075W	0.0456445	162.232
YBL001C	0.0285375	180.974
YBL002W	0.096998	205.889
YBL003C	0.0977624	195.933
YBL004W	0.0309158	116.817
YBL005W	0.0188503	64.4642
YBL005W-A	0.0532651	252.262
YBL005W-B	0.032532	231.863
YBL006C	0.0124498	121.933
YBL007C	0.00529153	276.414
YBL008W	0.0133416	230.598
YBL009W	0.0564797	220.015
YBL010C	0.0215727	230.32
YBL011W	0.00699438	343.033
YBL012C	0.0164975	251.903
YBL013W	0.0192585	221.606
YBL014C	0.0241261	128.479
YBL015W	0.0102555	299.535
YBL016W	0.0425964	55.494
YBL017C	0.0198161	63.7103
YBL018C	0.0252415	179.135
YBL020W	0.0205728	230.459
YBL022C	0.01264	47.7472
YBL023C	0.0462149	353.054
YBL024W	0.0164147	63.68
YBL026W	0.0217323	165.994
YBL028C	0.0120979	99.6959
YBL030C	0.00947985	1.01444
YBL031W	0.0395944	233.951
YBL032W	0.0301633	106.164
YBL033C	0.0125126	46.7143
YBL034C	0.0440726	235.071
YBL035C	0.0980334	273.042
YBL036C	0.0113566	82.8357
YBL037W	0.0177065	170.655
YBL038W	0.00991175	35.9244
YBL039C	0.0173868	119.266
YBL043W	0.0212526	150.51
YBL045C	0.0250183	351.87
YBL046W	0.0156526	261.686
YBL049W	0.0138472	314.34
YBL050W	0.030066	11.288
YBL051C	0.0140013	248.935
YBL052C	0.0220386	172.569
YBL053W	0.0276208	125.171
YBL054W	0.0247511	165.507
YBL057C	0.0285099	37.522
YBL058W	0.0229933	19.2898
YBL059W	0.0107425	126.048
YBL060W	0.00876228	100.975
YBL061C	0.027163	301.656
YBL062W	0.00760932	249.773
YBL063W	0.0307322	203.423
YBL064C	0.0329531	12.0581
YBL065W	0.00974524	217.457
YBL066C	0.00190084	52.0309
YBL067C	0.00805657	63.786
YBL068W	0.0141942	105.845
YBL069W	0.0258215	150.718
YBL070C	0.0277568	154.303
YBL071C	0.0258138	106.597
YBL073W	0.00359588	123.152
YBL074C	0.00767822	40.883
YBL075C	0.0246761	158.28
YBL076C	0.0151136	235.738
YBL077W	0.0184451	119.814
YBL078C	0.0157256	214.351
YBL079W	0.0168567	121.153
YBL080C	0.0116907	198.793
YBL081W	0.0170661	229.395
YBL082C	0.0512803	184.313
YBL083C	0.0255747	125.191
YBL084C	0.00688905	121.131
YBL085W	0.0249091	188.008
YBL086C	0.036696	270.108
YBL087C	0.00882671	92.2296
YBL088C	0.012637	139.314
YBL089W	0.0231897	47.4919
YBL090W	0.0917351	259.816
YBL091C	0.0163262	40.8622
YBL092W	0.0147813	14.7953
YBL095W	0.0255534	115.42
YBL096C	0.0306526	125.521
YBL097W	0.0263702	152.577
YBL098W	0.0406585	105.097
YBL099W	0.00726194	46.9572
YBL100C	0.00890163	308.968
YBL101C	0.0207909	358.611
YBL101W-A	0.0475024	235.233
YBL101W-B	0.031171	249.892
YBL104C	0.00338265	151.191
YBL105C	0.0195657	73.6354
YBL107C	0.000976016	144.119
YBL107W-A	0.017167	207.995
YBL108W	0.0134381	215.228
YBL109W	0.0586425	300.785
YBL111C	0.0798442	295.411
YBL112C	0.0774333	301.876
YBL113C	0.072939	290.903
YBR001C	0.019179	1.3926
YBR003W	0.0260821	0.161275
YBR005W	0.0247219	37.9642
YBR006W	0.0233994	318.356
YBR007C	0.019758	211.659
YBR008C	0.0325037	177.642
YBR009C	0.0949842	205.457
YBR010W	0.0834819	211.591
YBR011C	0.00615392	126.087
YBR012W-A	0.0516394	267.568
YBR012W-B	0.0346462	233.551
YBR014C	0.00643665	108.873
YBR015C	0.0332351	235.616
YBR016W	0.0153731	95.6248
YBR017C	0.0130548	135.633
YBR018C	0.0342635	9.60453
YBR019C	0.0184201	169.647
YBR020W	0.0131374	27.8836
YBR021W	0.012674	177.151
YBR022W	0.0100682	276.301
YBR023C	0.0232121	316.618
YBR026C	0.0207327	322.772
YBR028C	0.0331958	169.573
YBR030W	0.014249	105.878
YBR031W	0.00825507	27.6297
YBR034C	0.0166156	116.901
YBR035C	0.00994522	15.9973
YBR037C	0.0121524	64.9467
YBR038W	0.0908253	77.4347
YBR039W	0.0136517	329.964
YBR040W	0.0584094	62.3432
YBR041W	0.034592	238.677
YBR042C	0.0381254	253.684
YBR045C	0.00919339	168.54
YBR046C	0.0162961	345.9
YBR047W	0.0010445	99.2977
YBR048W	0.0105664	57.151
YBR049C	0.01588	177.408
YBR050C	0.0129845	119.259
YBR051W	0.0283698	59.0117
YBR052C	0.0313347	33.3543
YBR053C	0.0266369	340.673
YBR054W	0.0325672	7.64825
YBR055C	0.00945988	108.221
YBR056W	0.0239465	343.553
YBR058C	0.0141732	356.414
YBR059C	0.0155522	17.0154
YBR060C	0.0162721	34.5446
YBR061C	0.00913114	53.1709
YBR062C	0.0180076	151.015
YBR063C	0.0120112	144.218
YBR064W	0.0190581	142.522
YBR065C	0.00510692	200.906
YBR066C	0.0352995	28.8365
YBR067C	0.0494402	329.729
YBR068C	0.00275815	351.85
YBR069C	0.025912	42.8266
YBR070C	0.087969	269.386
YBR071W	0.116481	299.923
YBR072W	0.0534606	282.154
YBR073W	0.0747437	258.656
YBR074W	0.0166645	299.907
YBR076W	0.0100139	155.088
YBR078W	0.0343318	168.064
YBR080C	0.00813776	248.603
YBR081C	0.00163196	68.8846
YBR082C	0.021188	159.172
YBR083W	0.0834672	9.74568
YBR086C	0.0380938	141.952
YBR087W	0.0338105	262.554
YBR088C	0.100263	262.341
YBR089W	0.126133	266.623
YBR090C-A	0.0129244	101.301
YBR092C	0.0683288	47.8405
YBR093C	0.0574329	49.5879
YBR094W	0.0232975	103.106
YBR096W	0.0084053	132.242
YBR097W	0.010157	97.5428
YBR098W	0.0273478	281.311
YBR099C	0.00824509	82.0867
YBR101C	0.0201002	221.385
YBR103W	0.0254525	164.313
YBR104W	0.0197581	180.638
YBR105C	0.00732142	172.367
YBR106W	0.00611611	189.247
YBR108W	0.0099691	292.941
YBR111C	0.00793234	26.6297
YBR112C	0.0236663	261.952
YBR113W	0.0243314	226.175
YBR114W	0.0148464	336.728
YBR116C	0.0132219	316.11
YBR117C	0.0264473	222.538
YBR119W	0.00237237	145.61
YBR122C	0.0203034	4.18242
YBR123C	0.0348171	138.063
YBR124W	0.0243161	128.829
YBR125C	0.0223317	27.3175
YBR126C	0.037453	2.09728
YBR127C	0.00666807	139.391
YBR128C	0.0116893	57.1753
YBR129C	0.0217476	8.63175
YBR132C	0.0203974	346.803
YBR133C	0.0253839	117.036
YBR134W	0.0112568	102.045
YBR137W	0.0148857	87.1547
YBR138C	0.0579538	90.1184
YBR139W	0.0517136	31.1761
YBR140C	0.0243546	45.6803
YBR141C	0.014243	112.086
YBR142W	0.0147673	50.2438
YBR143C	0.00299861	142.595
YBR144C	0.0186524	336.818
YBR145W	0.0150537	250.515
YBR146W	0.0353174	352.509
YBR148W	0.0130831	155.291
YBR149W	0.0328622	325.476
YBR150C	0.0331262	65.3293
YBR151W	0.0168214	347.449
YBR152W	0.00701089	66.2971
YBR154C	0.0158528	119.604
YBR155W	0.0148427	146.276
YBR156C	0.0180398	199.399
YBR157C	0.0270918	344.52
YBR158W	0.0971441	359.203
YBR161W	0.035075	267.506
YBR162C	0.00437575	327.569
YBR162W-A	0.0225016	131.919
YBR163W	0.00915039	53.0434
YBR164C	0.0204759	60.755
YBR166C	0.00791723	155.311
YBR167C	0.022678	145.768
YBR169C	0.0259042	252.329
YBR170C	0.0187795	334.278
YBR174C	0.0105221	223.81
YBR175W	0.0186709	64.4923
YBR177C	0.0282115	16.1735
YBR179C	0.0167341	51.6741
YBR180W	0.0181035	51.9217
YBR183W	0.0420342	0.487236
YBR184W	0.0188851	179.158
YBR185C	0.00113216	200.718
YBR186W	0.00865987	160.437
YBR187W	0.0279061	169.264
YBR188C	0.00108417	128.725
YBR189W	0.0106634	71.1965
YBR191W	0.0187564	82.8936
YBR193C	0.0185017	8.24609
YBR195C	0.00656941	314.519
YBR197C	0.01272	138.369
YBR198C	0.022497	116.412
YBR199W	0.0201452	2.17067
YBR200W	0.027817	26.8038
YBR202W	0.0676049	11.7206
YBR203W	0.0318211	47.7646
YBR205W	0.0122513	210.448
YBR208C	0.0248636	293.5
YBR211C	0.0133424	163.592
YBR213W	0.00818007	160.253
YBR214W	0.0158802	322.038
YBR215W	0.0117101	217.342
YBR216C	0.00959269	307.633
YBR217W	0.00350969	180.227
YBR219C	0.00216015	269.253
YBR220C	0.020722	246.098
YBR222C	0.0051338	53.2311
YBR223C	0.0142508	272.864
YBR225W	0.00489507	32.2151
YBR227C	0.017902	94.271
YBR228W	0.0101292	90.3031
YBR229C	0.024623	14.8653
YBR230C	0.0111068	49.7844
YBR231C	0.00435317	42.0566
YBR232C	0.027919	309.741
YBR233W	0.0453729	289.574
YBR234C	0.0141795	308.122
YBR238C	0.0182179	201.052
YBR239C	0.0202066	150.048
YBR240C	0.00575503	144.096
YBR241C	0.015125	202.227
YBR242W	0.0441085	155.867
YBR243C	0.0329025	177.013
YBR244W	0.00140581	352.633
YBR245C	0.0284016	264.244
YBR246W	0.0140674	226.126
YBR247C	0.0203984	132.032
YBR248C	0.00936738	124.428
YBR249C	0.00642853	234.548
YBR250W	0.0195051	306.06
YBR252W	0.0288651	187.825
YBR254C	0.0175719	102.726
YBR255W	0.0212714	122.283
YBR256C	0.0111985	35.5645
YBR257W	0.0101307	143.935
YBR258C	0.0221022	90.4123
YBR260C	0.0111505	140.527
YBR261C	0.0194956	27.3483
YBR262C	0.0165735	97.7484
YBR263W	0.00252476	105.878
YBR264C	0.0166212	13.5647
YBR265W	0.0143851	94.9344
YBR266C	0.0131176	145.892
YBR267W	0.0231368	123.63
YBR268W	0.0089866	92.4947
YBR269C	0.00446436	64.0205
YBR270C	0.00540606	51.0028
YBR271W	0.0155417	198.32
YBR273C	0.0101274	36.9365
YBR275C	0.0666762	251.676
YBR276C	0.0202248	258.211
YBR277C	0.0253927	314.105
YBR278W	0.0187794	302.088
YBR280C	0.00851539	297.138
YBR281C	0.0439754	285.328
YBR282W	0.00505088	24.8785
YBR283C	0.0193931	86.8635
YBR284W	0.0116553	246.633
YBR286W	0.0173823	317.747
YBR287W	0.0139479	69.8631
YBR289W	0.0298038	188.79
YBR291C	0.0263595	159.863
YBR294W	0.0365486	295.128
YBR295W	0.0171287	90.2132
YBR296C	0.036257	356.341
YBR297W	0.00852874	85.721
YBR298C	0.0145255	8.78918
YBR299W	0.019732	269.971
YBR300C	0.0128616	244.781
YBR301W	0.0190365	314.038
YBR302C	0.022552	264.359
YCL001W	0.0324873	212.772
YCL001W-A	0.0099224	135.185
YCL004W	0.00387144	314.449
YCL005W	0.00664706	110.711
YCL008C	0.00214316	234.978
YCL009C	0.00686786	179.68
YCL012W	0.0394059	104.781
YCL014W	0.0503113	130.574
YCL018W	0.018987	71.8716
YCL019W	0.034585	255.514
YCL020W	0.0513413	232.251
YCL022C	0.0378574	277.852
YCL024W	0.117457	288.928
YCL025C	0.0269962	355.515
YCL026C-A	0.0171872	235.37
YCL027W	0.0487921	59.3341
YCL028W	0.0102738	264.624
YCL029C	0.0163706	232.874
YCL030C	0.0278522	216.149
YCL031C	0.00761897	140.426
YCL033C	0.00604281	101.908
YCL034W	0.0190094	89.2827
YCL035C	0.00405124	65.8844
YCL036W	0.0176643	147.416
YCL037C	0.0115851	184.37
YCL038C	0.0095496	356.869
YCL039W	0.011534	326.46
YCL040W	0.0598428	330.628
YCL043C	0.00333335	114.388
YCL046W	0.00728344	295.321
YCL047C	0.0237791	356.211
YCL048W	0.0189533	175.841
YCL049C	0.00453523	65.4579
YCL050C	0.0188625	215.491
YCL054W	0.0156707	129.311
YCL055W	0.0436354	60.5735
YCL058C	0.0180782	80.6436
YCL059C	0.0189962	151.34
YCL061C	0.0731167	270.199
YCL063W	0.030703	150.679
YCL064C	0.0405062	114.13
YCL065W	0.0327259	24.5515
YCL066W	0.0160293	138.449
YCL067C	0.0192272	32.3863
YCL068C	0.00668887	81.3382
YCL069W	0.0245474	268.512
YCL073C	0.0408632	293.274
YCL074W	0.0348717	340.53
YCR001W	0.0191989	49.1288
YCR002C	0.0142956	99.4185
YCR003W	0.00847855	8.17302
YCR004C	0.0347826	21.3242
YCR005C	0.0486858	323.262
YCR007C	0.00911991	359.56
YCR008W	0.0225358	115.181
YCR009C	0.0275946	35.2547
YCR011C	0.0172263	139.699
YCR012W	0.00900316	143.153
YCR013C	0.0214547	118.994
YCR014C	0.02293	154.277
YCR015C	0.0105371	106.349
YCR018C-A	0.021529	217.001
YCR020C	0.0188633	185.94
YCR020W-B	0.0122661	223.469
YCR021C	0.0165669	243.384
YCR023C	0.0232586	179.844
YCR024C	0.00613059	119.174
YCR024C-A	0.057019	88.4628
YCR026C	0.0230639	217.089
YCR027C	0.0133571	60.1099
YCR028C	0.00428074	77.9095
YCR028C-A	0.016362	121.94
YCR030C	0.0205964	3.97849
YCR031C	0.0119065	55.5395
YCR032W	0.0149672	262.656
YCR033W	0.012118	132.242
YCR034W	0.0239402	192.984
YCR035C	0.0153389	127.163
YCR037C	0.0278995	100.84
YCR038C	0.0129607	38.6932
YCR039C	0.0216029	48.9403
YCR040W	0.00360345	185.837
YCR041W	0.00835106	332.924
YCR042C	0.0421942	6.54802
YCR043C	0.0215768	109.211
YCR044C	0.0202254	344.799
YCR045C	0.00879014	192.089
YCR046C	0.0110107	35.3968
YCR047C	0.012869	140.317
YCR048W	0.0150622	206.063
YCR049C	0.0141438	203.988
YCR051W	0.0243868	72.455
YCR054C	0.0082256	2.11135
YCR057C	0.0180003	141.184
YCR059C	0.0175172	42.4442
YCR060W	0.013002	151.723
YCR062W	0.0176486	162.962
YCR063W	0.0103111	26.9692
YCR065W	0.0636372	260.11
YCR068W	0.0199975	331.062
YCR069W	0.0151331	165.318
YCR072C	0.0235854	121.56
YCR073W-A	0.03107	4.14071
YCR075C	0.0184892	192.125
YCR077C	0.00729039	43.3925
YCR079W	0.00626938	306.441
YCR082W	0.0216198	79.1359
YCR083W	0.00457066	12.8179
YCR084C	0.0325896	168.728
YCR086W	0.0240021	141.199
YCR087C-A	0.0246123	79.9096
YCR087W	0.0322539	114.687
YCR088W	0.0111885	272.492
YCR089W	0.052359	62.9294
YCR090C	0.0331932	59.5814
YCR091W	0.0206633	20.5324
YCR092C	0.00530517	269.057
YCR094W	0.0235862	161.093
YCR096C	0.0276828	67.8668
YCR097W	0.0227696	41.3863
YCR097W-A	0.0208108	45.795
YCR098C	0.0202556	137.776
YCR099C	0.00901859	17.5298
YCR100C	0.011599	261.454
YCR101C	0.0191885	17.5059
YCR102C	0.00263502	293.869
YCR102W-A	0.0150086	56.3791
YCR103C	0.0140394	295.549
YCR106W	0.0132331	345.112
YDL001W	0.0132545	332.533
YDL002C	0.015186	38.0141
YDL003W	0.127667	275.281
YDL005C	0.0179443	315.154
YDL009C	0.0350308	279.061
YDL011C	0.0408528	266.236
YDL012C	0.00978382	96.8288
YDL014W	0.0222853	137.764
YDL015C	0.0122377	321.413
YDL016C	0.013883	99.6345
YDL017W	0.0247514	283.592
YDL018C	0.0853791	281.049
YDL019C	0.0229833	336.323
YDL020C	0.0145657	229.356
YDL021W	0.0228979	325.677
YDL022W	0.0515242	15.5902
YDL023C	0.0495701	356.563
YDL024C	0.0415182	352.647
YDL027C	0.0180123	318.95
YDL028C	0.0279022	164.273
YDL029W	0.0159228	316.972
YDL030W	0.0211278	140.517
YDL031W	0.0280271	118.321
YDL033C	0.00898991	220.209
YDL035C	0.0120564	327.57
YDL036C	0.0139025	27.3495
YDL037C	0.0281899	34.9028
YDL038C	0.0325814	49.5608
YDL039C	0.0126721	43.79
YDL041W	0.0243587	273.054
YDL042C	0.00440815	217.914
YDL044C	0.0246678	345.352
YDL045C	0.00591989	351.883
YDL045W-A	0.00460675	84.5723
YDL046W	0.0085759	29.7022
YDL047W	0.0122128	20.6932
YDL048C	0.0224933	59.976
YDL049C	0.00829586	219.822
YDL050C	0.0186219	116.505
YDL051W	0.0209286	133.516
YDL052C	0.0174125	181.846
YDL053C	0.00474865	25.9198
YDL054C	0.0144845	210.504
YDL055C	0.0348883	209.988
YDL056W	0.0319817	170.163
YDL057W	0.00535583	219.067
YDL058W	0.00356662	191.401
YDL059C	0.0253002	166.93
YDL060W	0.0148302	137.022
YDL061C	0.0109805	80.3707
YDL062W	0.0285422	142.655
YDL063C	0.0306782	137.255
YDL064W	0.0153006	143.254
YDL065C	0.0136622	214.735
YDL066W	0.0206943	294.607
YDL067C	0.01068	89.0162
YDL068W	0.00735206	161.093
YDL070W	0.0165284	166.223
YDL072C	0.00439757	124.25
YDL073W	0.0102784	147.797
YDL074C	0.020352	151.567
YDL076C	0.0148671	126.207
YDL077C	0.00928797	3.26688
YDL078C	0.00924786	7.18218
YDL079C	0.00876893	90.5275
YDL080C	0.00568589	14.7586
YDL081C	0.0244864	90.9212
YDL082W	0.0140436	89.7309
YDL083C	0.00353957	110.101
YDL084W	0.0132483	46.166
YDL085W	0.00579651	28.4509
YDL086W	0.0174419	65.7819
YDL087C	0.0145858	150.457
YDL088C	0.0085884	47.849
YDL089W	0.0169451	350.267
YDL090C	0.0278761	292.234
YDL092W	0.0072324	69.4363
YDL093W	0.0561754	244.698
YDL095W	0.0305489	239.844
YDL096C	0.0606844	238.35
YDL097C	0.014513	355.176
YDL099W	0.00968183	252.253
YDL100C	0.0138786	320.108
YDL101C	0.0795035	252.822
YDL102W	0.0566582	272.487
YDL103C	0.0555383	284.188
YDL105W	0.0419008	279.794
YDL106C	0.0127886	223.363
YDL107W	0.00304877	161.3
YDL108W	0.0116859	163.033
YDL110C	0.0202906	342.514
YDL112W	0.0152382	100.074
YDL113C	0.0199945	12.8822
YDL114W	0.0108376	52.9584
YDL115C	0.0162819	97.9051
YDL116W	0.0164872	88.7194
YDL118W	0.0444281	346.651
YDL119C	0.0556943	347.633
YDL123W	0.00559955	49.38
YDL124W	0.0307503	319.079
YDL125C	0.0202791	47.1433
YDL127W	0.0460231	346.885
YDL128W	0.0342922	346.589
YDL129W	0.0125461	219.09
YDL130W	0.0147062	42.6792
YDL130W-A	0.0284163	344.902
YDL131W	0.0098805	120.932
YDL133C-A	0.0265593	94.4826
YDL133W	0.0155337	109.311
YDL134C	0.0184539	28.4154
YDL135C	0.00332723	320.464
YDL136W	0.0177048	31.5843
YDL137W	0.0169691	108.939
YDL138W	0.0327095	25.5279
YDL139C	0.0118601	150.367
YDL140C	0.011815	23.1591
YDL141W	0.00466615	13.7321
YDL143W	0.0163682	71.8053
YDL144C	0.0236006	8.64971
YDL145C	0.0196192	204.731
YDL146W	0.0140125	208.008
YDL147W	0.00869435	72.8353
YDL148C	0.00889792	156.279
YDL149W	0.00930357	207.396
YDL150W	0.0120379	133.656
YDL152W	0.00896374	253.187
YDL153C	0.0174819	135.121
YDL155W	0.035433	257.765
YDL156W	0.0730467	276.904
YDL157C	0.0254592	224.39
YDL158C	0.0152514	186.717
YDL159W	0.00630763	241.665
YDL160C	0.016541	344.178
YDL161W	0.0287295	304.202
YDL163W	0.0448789	258.155
YDL164C	0.0846619	272.298
YDL165W	0.00654762	95.8089
YDL166C	0.021976	128.512
YDL169C	0.0169834	284.816
YDL170W	0.0139851	174.508
YDL171C	0.00861313	269.297
YDL173W	0.0112976	337.201
YDL174C	0.0115998	75.6886
YDL175C	0.00731977	135.976
YDL176W	0.0164175	100.651
YDL177C	0.0214904	54.7471
YDL179W	0.127155	354.851
YDL180W	0.018161	8.07397
YDL181W	0.0161118	348.075
YDL182W	0.0147465	358.813
YDL183C	0.013332	26.6169
YDL184C	0.0172297	74.2821
YDL187C	0.000947433	101.497
YDL188C	0.0212667	356.679
YDL189W	0.00827248	125.84
YDL190C	0.0161428	82.2977
YDL191W	0.0156181	44.7627
YDL192W	0.0134014	102.771
YDL193W	0.00512942	276.777
YDL194W	0.00968364	16.6349
YDL195W	0.0176848	259.602
YDL197C	0.074117	253.609
YDL198C	0.00545593	67.1551
YDL199C	0.00845181	273.574
YDL200C	0.00159723	244.682
YDL201W	0.0126064	82.7938
YDL202W	0.0109245	36.8907
YDL203C	0.0198422	26.4532
YDL204W	0.00308913	323.247
YDL205C	0.00823472	336.348
YDL206W	0.020694	340.624
YDL207W	0.00787388	73.0185
YDL208W	0.0270274	93.6117
YDL209C	0.0109609	40.0877
YDL211C	0.0354243	247.916
YDL213C	0.0178652	80.8069
YDL214C	0.00538937	264.05
YDL215C	0.0136995	54.3462
YDL216C	0.0042783	290.822
YDL217C	0.0076319	20.2395
YDL218W	0.00249407	239.011
YDL219W	0.0259163	238.535
YDL220C	0.0427652	253.979
YDL222C	0.0303713	345.608
YDL223C	0.015185	228.99
YDL224C	0.0142999	84.8519
YDL225W	0.0060331	130.795
YDL227C	0.112742	328.782
YDL228C	0.008793	152.513
YDL230W	0.017194	311.74
YDL231C	0.013488	95.5913
YDL234C	0.0329207	41.4264
YDL237W	0.0185001	300.534
YDL238C	0.0120379	344.298
YDL239C	0.00862635	335.681
YDL240W	0.0147263	126.903
YDL243C	0.024666	265.103
YDL244W	0.0184307	258.393
YDL245C	0.0306063	281.145
YDL246C	0.037752	273.648
YDL247W	0.0202699	324.314
YDL248W	0.031536	262.089
YDR001C	0.0250027	324.131
YDR003W	0.0183717	120.657
YDR004W	0.0165051	330.097
YDR005C	0.0124761	225.351
YDR008C	0.0130697	75.2231
YDR009W	0.00540037	121.281
YDR011W	0.00711794	74.1073
YDR012W	0.00382984	107.363
YDR013W	0.0357228	288.092
YDR016C	0.0219545	128.172
YDR017C	0.0358801	184.18
YDR019C	0.00964013	147.247
YDR020C	0.0176225	124.133
YDR021W	0.029974	157.069
YDR024W	0.0121719	108.176
YDR026C	0.0138051	169.202
YDR027C	0.0130238	169.53
YDR028C	0.00992847	205.403
YDR029W	0.0217089	216.499
YDR030C	0.0280657	114.302
YDR032C	0.00362869	5.03475
YDR033W	0.10078	21.9477
YDR034C	0.0237392	44.0229
YDR034C-A	0.0144046	204.178
YDR034W-B	0.020096	324.621
YDR035W	0.0107323	20.6582
YDR038C	0.0146277	337.758
YDR039C	0.0123069	324.735
YDR040C	0.0195001	330.458
YDR041W	0.0311713	347.779
YDR042C	0.0209175	182.728
YDR044W	0.065812	173.216
YDR045C	0.00635103	255.933
YDR046C	0.0114664	132.009
YDR049W	0.0207366	139.418
YDR051C	0.0241668	128.434
YDR052C	0.0411919	259.461
YDR055W	0.112059	347.145
YDR056C	0.0158591	11.6584
YDR058C	0.0148395	163.917
YDR059C	0.00766286	35.8308
YDR060W	0.0281347	161.856
YDR061W	0.0115499	148.842
YDR062W	0.0175609	146.974
YDR063W	0.00199281	8.5366
YDR066C	0.0140214	106.367
YDR067C	0.0158708	17.5789
YDR069C	0.0140129	8.62349
YDR072C	0.0257282	38.4856
YDR073W	0.0116726	100.296
YDR074W	0.0251449	1.01598
YDR075W	0.0123337	153.964
YDR076W	0.0302952	307.03
YDR077W	0.0576783	339.231
YDR078C	0.0148569	16.3029
YDR079W	0.0168685	69.5398
YDR080W	0.0141638	81.3615
YDR081C	0.00398417	24.5888
YDR083W	0.0249752	125.252
YDR085C	0.0372484	35.5885
YDR086C	0.0108472	183.441
YDR088C	0.0191281	45.561
YDR089W	0.0325808	112.197
YDR091C	0.00289144	94.2127
YDR092W	0.00746483	91.0718
YDR094W	0.0191629	171.282
YDR096W	0.0242872	304.387
YDR097C	0.0952893	267.527
YDR098C	0.0218779	18.5759
YDR101C	0.0259833	138.477
YDR104C	0.0135589	66.9287
YDR105C	0.0132933	169.098
YDR106W	0.0223095	145.139
YDR107C	0.00744396	220.623
YDR108W	0.0208206	179.442
YDR109C	0.00583439	47.1249
YDR111C	0.0153362	316.602
YDR112W	0.018661	315.523
YDR113C	0.0766812	230.522
YDR114C	0.00704095	195.151
YDR115W	0.0174122	359.564
YDR116C	0.0156851	356.442
YDR118W	0.0150691	219.439
YDR120C	0.0155772	118.123
YDR121W	0.0151261	132.416
YDR122W	0.0185312	349.176
YDR123C	0.00678934	259.951
YDR124W	0.0343792	74.2236
YDR125C	0.0243323	46.731
YDR126W	0.00576411	229.683
YDR127W	0.00673733	323.395
YDR129C	0.0206509	15.1018
YDR130C	0.0110432	154.26
YDR131C	0.00177365	345.979
YDR132C	0.00858061	210.217
YDR133C	0.0168574	112.219
YDR134C	0.0116576	146.801
YDR136C	0.0423473	34.5629
YDR138W	0.0115514	40.3582
YDR139C	0.00835396	129.177
YDR140W	0.014875	185.859
YDR143C	0.0100369	206.046
YDR144C	0.0245495	258.034
YDR145W	0.0187354	225.591
YDR146C	0.0724806	108.287
YDR147W	0.0350916	125.961
YDR149C	0.011118	146.577
YDR150W	0.0252521	108.343
YDR151C	0.0164958	197.711
YDR153C	0.0179	156.078
YDR154C	0.0107239	126.44
YDR155C	0.00872619	38.4372
YDR156W	0.0193056	69.614
YDR158W	0.0171361	159.132
YDR159W	0.0167577	12.9669
YDR160W	0.00857225	350.898
YDR161W	0.0208999	142.638
YDR164C	0.00899409	20.5948
YDR166C	0.00409805	165.513
YDR169C	0.019461	335.683
YDR170C	0.0147775	147.847
YDR170W-A	0.0424128	249.62
YDR171W	0.0337298	275.687
YDR172W	0.0197519	146.681
YDR174W	0.0328744	41.873
YDR175C	0.0210164	344.978
YDR176W	0.0272224	188.891
YDR177W	0.0185185	60.9678
YDR178W	0.0248185	348.173
YDR179C	0.0365867	180.138
YDR180W	0.0448992	274.746
YDR181C	0.00820579	242.982
YDR183W	0.0332884	253.663
YDR184C	0.00186358	150.747
YDR185C	0.0117748	44.4057
YDR186C	0.0303247	218.44
YDR187C	0.00556396	14.0243
YDR188W	0.0123778	126.177
YDR189W	0.0195617	243.43
YDR191W	0.040973	6.5519
YDR193W	0.0182954	315.249
YDR194C	0.0109074	340.31
YDR195W	0.0116158	119.91
YDR196C	0.0168712	1.15727
YDR197W	0.00569848	75.5469
YDR198C	0.0155312	73.5209
YDR199W	0.00958024	157.753
YDR200C	0.0208998	204.734
YDR201W	0.00842553	200.351
YDR202C	0.0249353	358.964
YDR203W	0.00769653	316.709
YDR204W	0.0279913	27.7992
YDR206W	0.0152746	147.539
YDR207C	0.0255884	164.279
YDR208W	0.0163551	144.54
YDR209C	0.010719	111.54
YDR210W	0.0137145	99.0339
YDR211W	0.00916706	158.35
YDR213W	0.028568	204.364
YDR214W	0.0247036	170.128
YDR215C	0.0178424	123.885
YDR216W	0.0227135	338.588
YDR217C	0.0149909	231.907
YDR218C	0.0146215	194.568
YDR219C	0.0324063	190.754
YDR221W	0.0153261	193.334
YDR222W	0.0764435	222.651
YDR223W	0.013045	188.367
YDR224C	0.0889375	201.324
YDR225W	0.0848145	205.246
YDR226W	0.0154618	81.8421
YDR227W	0.0288735	148.995
YDR228C	0.0113322	119.179
YDR229W	0.0103909	7.13194
YDR230W	0.0323382	52.9072
YDR232W	0.0147658	156.852
YDR234W	0.0291093	154.954
YDR239C	0.0166961	161.267
YDR242W	0.0102864	94.0861
YDR244W	0.0189021	109.893
YDR245W	0.0406479	148.858
YDR247W	0.00904687	323.852
YDR248C	0.0138651	17.7938
YDR249C	0.0243257	23.4895
YDR251W	0.0428854	341.97
YDR253C	0.00591997	168.984
YDR254W	0.00456373	309.407
YDR256C	0.0186917	315.834
YDR257C	0.00226115	351.58
YDR259C	0.00859353	33.0978
YDR260C	0.013215	357.525
YDR261C	0.0289852	219.105
YDR263C	0.020236	185.403
YDR264C	0.012054	77.686
YDR265W	0.0102461	96.7899
YDR266C	0.0177278	124.026
YDR267C	0.0162828	128.886
YDR268W	0.0140605	154.075
YDR269C	0.00910588	223.125
YDR270W	0.0496208	166.387
YDR271C	0.0133985	80.5442
YDR272W	0.016325	76.9079
YDR273W	0.00607691	317.635
YDR274C	0.0202769	316.809
YDR275W	0.0208871	153.181
YDR276C	0.0290256	90.3934
YDR277C	0.04921	30.0144
YDR279W	0.0553908	270.792
YDR280W	0.0160172	117.802
YDR281C	0.0338253	149.92
YDR282C	0.0156545	148.998
YDR283C	0.00722355	32.8337
YDR285W	0.0144306	208.552
YDR287W	0.0149594	181.34
YDR288W	0.00238306	234.172
YDR289C	0.0177278	75.6633
YDR290W	0.0256695	56.1099
YDR291W	0.0147839	123.479
YDR293C	0.01007	12.7204
YDR294C	0.015933	137.571
YDR296W	0.0189681	25.5148
YDR297W	0.0616085	238.444
YDR298C	0.0112627	44.5086
YDR299W	0.0208942	171.03
YDR301W	0.0150874	39.9259
YDR302W	0.0198917	165.809
YDR303C	0.00552105	147.206
YDR304C	0.00523227	325.031
YDR307W	0.0368667	268.612
YDR309C	0.0681007	321.283
YDR310C	0.00417403	345.644
YDR311W	0.00911774	282.872
YDR314C	0.00324042	215.828
YDR315C	0.0169117	122.808
YDR316W	0.00440228	54.1047
YDR317W	0.0197343	180.636
YDR320C	0.0274325	151.542
YDR321W	0.0155699	41.3576
YDR323C	0.0197346	148.077
YDR324C	0.0234292	126.542
YDR325W	0.0362233	154.787
YDR326C	0.027107	136.223
YDR327W	0.00303283	19.9969
YDR328C	0.00710007	17.9991
YDR330W	0.0156401	24.1111
YDR333C	0.010271	88.0387
YDR334W	0.0180483	85.6823
YDR335W	0.017298	108.11
YDR336W	0.0186464	61.9747
YDR337W	0.0166102	12.3481
YDR339C	0.0155012	78.9507
YDR340W	0.0152409	36.7466
YDR342C	0.0428677	5.90976
YDR343C	0.0537219	353.534
YDR345C	0.0510298	5.84239
YDR346C	0.0251165	146.05
YDR347W	0.0164694	7.56808
YDR349C	0.00677207	67.5765
YDR350C	0.00574065	41.6947
YDR351W	0.00724152	90.6078
YDR352W	0.0309305	203.555
YDR355C	0.020703	193.688
YDR357C	0.017014	334.564
YDR358W	0.0133116	22.2169
YDR360W	0.0195829	359.193
YDR361C	0.0216625	134.121
YDR362C	0.0115621	153.553
YDR363W	0.0161767	107.207
YDR364C	0.0148082	119.848
YDR365C	0.00736515	42.1178
YDR366C	0.012931	49.689
YDR367W	0.014285	89.4436
YDR368W	0.0167282	311.94
YDR369C	0.015594	343.861
YDR370C	0.00863504	71.1242
YDR371W	0.0116482	220.083
YDR372C	0.00884051	353.707
YDR373W	0.0161074	79.4041
YDR374C	0.00505976	109.599
YDR375C	0.0127271	357.93
YDR376W	0.013655	318.825
YDR378C	0.00973602	270.582
YDR379W	0.0392062	11.0175
YDR380W	0.0201484	116.951
YDR381W	0.0135487	57.9036
YDR382W	0.0259007	99.7101
YDR383C	0.0117652	291.812
YDR384C	0.0306215	239.24
YDR387C	0.0121251	24.3844
YDR388W	0.00395511	274.736
YDR389W	0.00256145	330.904
YDR390C	0.0172555	135.891
YDR391C	0.0174808	327.693
YDR393W	0.0281669	296.34
YDR395W	0.00927518	109.699
YDR396W	0.0126549	77.2842
YDR399W	0.0382508	241.408
YDR400W	0.0571732	246.083
YDR401W	0.0189517	113.866
YDR402C	0.0176322	346.627
YDR403W	0.00350699	144.525
YDR404C	0.0202457	102.847
YDR405W	0.00578833	256.786
YDR406W	0.00869721	82.0532
YDR407C	0.0168218	217.643
YDR408C	0.0210153	64.1595
YDR409W	0.0137583	82.6838
YDR410C	0.021968	88.8335
YDR412W	0.0115034	111.267
YDR414C	0.0118302	33.2315
YDR416W	0.0203334	126.62
YDR419W	0.0198816	108.257
YDR420W	0.00959117	193.885
YDR421W	0.0142963	81.5577
YDR422C	0.00688967	142.553
YDR423C	0.0150217	49.4135
YDR424C	0.00789118	64.7952
YDR425W	0.0283204	312.659
YDR426C	0.00874583	23.1088
YDR428C	0.00531668	340.819
YDR430C	0.0258249	358.171
YDR431W	0.0141694	292.584
YDR432W	0.0222818	27.6953
YDR433W	0.0234286	69.888
YDR434W	0.00079703	121.66
YDR435C	0.0102144	348.844
YDR436W	0.0252303	24.261
YDR438W	0.00633182	155.094
YDR439W	0.00593138	121.611
YDR440W	0.0389375	257.752
YDR442W	0.0163154	303.029
YDR443C	0.00114726	336.99
YDR444W	0.029115	189.25
YDR446W	0.00767216	36.7936
YDR447C	0.0204539	103.899
YDR448W	0.0081091	153.11
YDR449C	0.0159592	157.553
YDR450W	0.0146623	46.1353
YDR451C	0.0194027	153.902
YDR452W	0.0148451	108.733
YDR453C	0.0153856	38.9122
YDR454C	0.0201339	85.7405
YDR455C	0.0133705	110.123
YDR457W	0.0252277	70.1314
YDR459C	0.0130612	124.275
YDR460W	0.0196401	63.3771
YDR461W	0.0408008	14.823
YDR462W	0.0165752	21.6894
YDR463W	0.00932234	215.203
YDR464W	0.0392103	155.777
YDR465C	0.0105996	135.457
YDR466W	0.0128718	213.944
YDR467C	0.0158766	60.8585
YDR468C	0.0189405	133.636
YDR469W	0.00975805	228.671
YDR471W	0.0222172	41.0742
YDR472W	0.0240438	95.1005
YDR473C	0.0037859	173.435
YDR474C	0.00846931	50.7308
YDR475C	0.00626197	40.2154
YDR477W	0.00669459	131.699
YDR479C	0.0154616	55.8415
YDR480W	0.0512065	235.582
YDR481C	0.0403611	273.607
YDR482C	0.00676537	8.06884
YDR483W	0.00853884	244.469
YDR484W	0.0171778	13.3095
YDR485C	0.00618037	69.553
YDR486C	0.0129145	63.6067
YDR488C	0.0505218	230.503
YDR489W	0.0322455	277.805
YDR490C	0.0103294	8.04207
YDR491C	0.00873758	86.0494
YDR492W	0.0255028	77.4418
YDR494W	0.0234836	6.64915
YDR495C	0.0161662	354.895
YDR496C	0.0149381	132.977
YDR497C	0.0160478	252.337
YDR499W	0.0195796	250.712
YDR500C	0.0180724	103.678
YDR501W	0.0439483	234.697
YDR502C	0.00844947	240.019
YDR503C	0.0503355	274.977
YDR504C	0.0158166	204.791
YDR505C	0.0114616	328.224
YDR506C	0.0231064	257.853
YDR507C	0.0954439	268.813
YDR508C	0.00749361	113.897
YDR510W	0.0186331	116.214
YDR511W	0.0236694	359.182
YDR512C	0.00931412	347.39
YDR513W	0.0237659	0.212792
YDR515W	0.0156508	235.138
YDR516C	0.0530159	337.589
YDR517W	0.0238789	311.295
YDR518W	0.0493015	226.026
YDR519W	0.00852352	34.1563
YDR522C	0.0157407	153.504
YDR523C	0.0298119	143.39
YDR524C	0.00578958	248.808
YDR525W-A	0.0137869	289.461
YDR526C	0.019397	105.826
YDR527W	0.00742932	89.5923
YDR528W	0.0605757	294.72
YDR530C	0.0245871	16.1037
YDR531W	0.00942345	212.054
YDR532C	0.0217974	258.222
YDR533C	0.0167185	209.234
YDR534C	0.04802	295.424
YDR536W	0.012759	4.55227
YDR537C	0.0376175	217.636
YDR538W	0.0113819	176.916
YDR539W	0.0224742	335.791
YDR540C	0.0226577	353.956
YDR541C	0.029321	341.271
YDR542W	0.0118536	296.632
YDR543C	0.00532625	267.914
YDR544C	0.0488452	305.9
YDR545W	0.0664749	292.454
YEL001C	0.0131261	330.727
YEL004W	0.0187203	260.467
YEL005C	0.0169365	212.58
YEL006W	0.0081995	152.816
YEL008W	0.00116491	22.0552
YEL009C	0.0174313	155.548
YEL011W	0.0193681	346.569
YEL012W	0.0178995	26.2916
YEL013W	0.011334	18.7177
YEL016C	0.0167824	161.824
YEL017C-A	0.0330845	125.404
YEL017W	0.0421793	157.192
YEL018W	0.0121392	215.455
YEL019C	0.0109328	211.808
YEL020C	0.0131937	153.086
YEL021W	0.0148783	107.809
YEL022W	0.0206312	233.951
YEL023C	0.00635226	335.067
YEL024W	0.0341635	343.561
YEL025C	0.0135157	50.0534
YEL026W	0.0197978	77.8046
YEL029C	0.0125721	68.6766
YEL030W	0.018129	167.977
YEL031W	0.0159859	219.278
YEL032W	0.0735298	349.032
YEL033W	0.014547	83.5615
YEL034W	0.0242225	82.7876
YEL035C	0.00952693	96.5467
YEL036C	0.0229856	163.685
YEL037C	0.0180399	67.6489
YEL038W	0.0247562	41.0712
YEL039C	0.0150494	15.2414
YEL040W	0.0625634	325.253
YEL041W	0.0181921	336.863
YEL042W	0.0324639	185.468
YEL043W	0.0113383	148.527
YEL044W	0.0190641	84.1546
YEL045C	0.00827257	297.227
YEL046C	0.00748325	42.2432
YEL047C	0.0649627	220.947
YEL049W	0.00867152	247.846
YEL050C	0.0128968	343.499
YEL052W	0.0166717	66.1812
YEL054C	0.015985	16.1539
YEL055C	0.0166759	161.34
YEL056W	0.0152058	101.82
YEL058W	0.012872	28.139
YEL059C-A	0.00602338	333.818
YEL059W	0.0122403	237.522
YEL060C	0.0128484	356.49
YEL061C	0.0562287	207.223
YEL062W	0.010693	172.488
YEL063C	0.0107986	140.749
YEL064C	0.0351802	236.559
YEL065W	0.0515452	142.135
YEL066W	0.0128088	218.68
YEL067C	0.00741914	20.9511
YEL068C	0.0118754	80.1836
YEL069C	0.0345338	263.408
YEL070W	0.0107871	162.229
YEL071W	0.0435766	247.434
YEL072W	0.00858887	218.334
YEL073C	0.015931	313.113
YEL074W	0.0365549	284.765
YEL075C	0.0857006	310.103
YEL076C	0.0835125	303.31
YEL076C-A	0.0845475	303.226
YEL076W-C	0.073238	301.171
YEL077C	0.0649243	297.105
YER001W	0.0784582	244.667
YER002W	0.0192497	171.258
YER003C	0.0527684	207.095
YER004W	0.0214428	18.2019
YER005W	0.012227	127.85
YER006W	0.0277924	135.067
YER008C	0.00337167	306.528
YER010C	0.00444702	188.492
YER011W	0.00932884	101.612
YER013W	0.0224579	175.438
YER014W	0.0240595	248.049
YER016W	0.0354044	233
YER017C	0.0386662	83.0553
YER018C	0.0222249	153.531
YER019C-A	0.0192657	81.9374
YER019W	0.0183449	162.364
YER020W	0.0300555	336.191
YER021W	0.00381286	110.83
YER022W	0.0113478	88.6423
YER023W	0.00272058	59.2267
YER024W	0.0141596	356.464
YER026C	0.0096795	13.8157
YER027C	0.0212247	304.452
YER028C	0.0129081	89.258
YER029C	0.0181731	131.954
YER030W	0.0215724	70.6739
YER031C	0.0215976	70.3645
YER032W	0.0583591	153.909
YER033C	0.0182211	74.9873
YER034W	0.0181447	85.1649
YER035W	0.0169802	64.1505
YER037W	0.0417774	53.7644
YER039C	0.0117696	82.7606
YER040W	0.0221334	356.338
YER042W	0.0247726	165.661
YER043C	0.00581127	313.544
YER044C	0.0257383	52.0212
YER044C-A	0.0108375	174.625
YER045C	0.0163344	349.291
YER046W	0.0141656	145.301
YER048W-A	0.0163331	94.4281
YER049W	0.0306882	134.8
YER050C	0.0116454	83.0132
YER051W	0.011836	103.587
YER052C	0.00650531	315.666
YER053C	0.0349832	7.51145
YER054C	0.024667	20.8419
YER055C	0.0138366	86.926
YER056C	0.021089	296.734
YER056C-A	0.0154224	49.9544
YER057C	0.0143448	178.793
YER058W	0.0074665	196.812
YER060W	0.00160494	112.763
YER061C	0.011491	152.24
YER062C	0.0137931	34.3524
YER063W	0.0205327	22.4537
YER064C	0.00802782	157.626
YER065C	0.0121394	121.166
YER067W	0.023417	338.165
YER069W	0.0228788	259.206
YER070W	0.134178	271.736
YER071C	0.0110261	299.714
YER072W	0.0169386	77.7516
YER074W	0.0107179	71.9376
YER075C	0.00549022	359.299
YER076C	0.0117271	155.988
YER077C	0.0218697	139.674
YER078C	0.01551	37.6806
YER079W	0.0179141	76.7528
YER080W	0.0127282	13.5826
YER081W	0.0388718	237.49
YER083C	0.00364052	255.284
YER085C	0.0101085	258.268
YER087C-A	0.0221981	168.332
YER087W	0.0504246	276.26
YER088C	0.0131918	106.233
YER089C	0.0195366	68.1447
YER090W	0.00950164	353.743
YER091C	0.00478622	354.144
YER091C-A	0.0156424	332.82
YER093C	0.0156747	133.301
YER094C	0.0194131	1.17601
YER095W	0.0770638	268.435
YER096W	0.0193478	217.452
YER098W	0.0159353	322.643
YER101C	0.0194736	137.526
YER103W	0.0121965	192.124
YER104W	0.013889	229.09
YER106W	0.00955885	215.233
YER107C	0.0110101	57.5463
YER108C	0.0287543	166.2
YER109C	0.010389	197.848
YER110C	0.0139682	92.3176
YER111C	0.0854953	293.104
YER112W	0.0107631	239.642
YER113C	0.0252744	266.531
YER114C	0.0364369	151.304
YER115C	0.0233271	125.319
YER118C	0.0430435	251.313
YER119C	0.00937015	204.408
YER120W	0.0220839	77.0265
YER122C	0.0318068	165.795
YER123W	0.00862688	125.813
YER124C	0.0684021	341.791
YER125W	0.0169002	143.994
YER126C	0.0181924	132.604
YER127W	0.00446692	111.736
YER128W	0.0277462	195.283
YER130C	0.0101211	111.525
YER132C	0.00547566	23.0655
YER133W	0.000878982	222.462
YER135C	0.0248843	267.267
YER136W	0.00877768	271.985
YER138C	0.0387209	242.673
YER138W-A	0.0198122	191.707
YER139C	0.0153323	46.2324
YER140W	0.00803873	67.5425
YER141W	0.0101492	70.9776
YER144C	0.00842411	148.855
YER145C	0.0338736	124.984
YER146W	0.00955796	44.463
YER147C	0.00366247	46.2783
YER149C	0.027754	284.706
YER150W	0.026365	320.373
YER151C	0.0203046	163.69
YER152C	0.00741421	358.991
YER153C	0.0275632	299.528
YER154W	0.0229517	348.049
YER156C	0.00849986	96.0264
YER158C	0.00731571	314.787
YER159C	0.0224308	138.669
YER160C	0.0301061	240.353
YER162C	0.0201262	120.163
YER163C	0.0164944	169.867
YER165W	0.00744724	154.83
YER166W	0.0121563	147.294
YER170W	0.0320976	200.174
YER173W	0.00829006	189.667
YER174C	0.0205356	305.423
YER175C	0.0165784	334.052
YER177W	0.0163547	131.254
YER178W	0.00727823	52.9285
YER180C	0.0218776	62.401
YER182W	0.0211591	19.4133
YER184C	0.0128001	78.1275
YER185W	0.029325	92.8789
YER186C	0.0033262	129.831
YER188W	0.0134538	331.882
YER189W	0.0744609	307.518
YER190W	0.0689763	290.652
YFL002C	0.0195191	116.186
YFL002W-A	0.040308	237.303
YFL003C	0.0214754	193.256
YFL004W	0.0142459	106.835
YFL006W	0.0434069	70.0333
YFL007W	0.0337791	56.6704
YFL008W	0.0846246	262.135
YFL009W	0.00580904	146.019
YFL011W	0.0268529	352.602
YFL011W-A	0.00498111	106.462
YFL012W	0.0433803	285.263
YFL015C	0.00666331	165.963
YFL016C	0.0284433	220.393
YFL017C	0.0327494	129.119
YFL017W-A	0.0194385	129.209
YFL020C	0.0114326	8.48096
YFL021W	0.0463255	352.37
YFL022C	0.0126508	48.1294
YFL023W	0.00676515	270.661
YFL024C	0.0148019	164.12
YFL025C	0.00673311	278.645
YFL026W	0.0745056	36.0648
YFL027C	0.0445957	27.8157
YFL028C	0.0182064	22.5189
YFL029C	0.0107458	107.405
YFL030W	0.0158102	45.0422
YFL031W	0.0106934	34.1198
YFL032W	0.00937421	16.7124
YFL033C	0.0134428	18.8537
YFL034W	0.0154321	86.6564
YFL035C	0.00550572	247.884
YFL035C-A	0.0367793	273.173
YFL036W	0.0395245	16.1639
YFL037W	0.0390394	173.849
YFL039C	0.0147104	242.097
YFL040W	0.00574066	354.518
YFL041W	0.01978	1.6622
YFL042C	0.0259486	323.49
YFL044C	0.0239153	13.5272
YFL047W	0.0142695	4.03018
YFL048C	0.0206816	13.6417
YFL049W	0.0175457	110.648
YFL051C	0.038293	136.235
YFL053W	0.0122782	37.2674
YFL054C	0.0196064	28.959
YFL055W	0.00672539	143.328
YFL056C	0.00495469	354.542
YFL057C	0.00773574	7.19223
YFL058W	0.0215589	258.086
YFL059W	0.0233639	264.439
YFL060C	0.0369496	262.175
YFL061W	0.0335506	268.142
YFL062W	0.0189823	278.862
YFL063W	0.0399895	304.996
YFL064C	0.0777057	311.998
YFL065C	0.0746625	306.365
YFL066C	0.0748746	289.12
YFL067W	0.0834538	291.566
YFL068W	0.0659659	291.707
YFR001W	0.0256935	44.1058
YFR002W	0.0152498	33.041
YFR004W	0.0143502	70.9595
YFR005C	0.0140125	52.8043
YFR008W	0.0105612	72.1019
YFR010W	0.01595	54.5648
YFR012W	0.00813906	348.213
YFR015C	0.032448	2.08766
YFR016C	0.0163247	249.539
YFR017C	0.0111381	28.5946
YFR018C	0.00911112	215.838
YFR019W	0.0200241	148.407
YFR021W	0.0147365	312.928
YFR022W	0.0141247	102.391
YFR026C	0.0186423	272.555
YFR028C	0.0215042	132.873
YFR029W	0.0127684	277.654
YFR030W	0.0268185	209.034
YFR031C	0.017501	226.734
YFR032C	0.0116245	47.8458
YFR032C-A	0.0201424	95.3168
YFR033C	0.0115799	35.3437
YFR034C	0.00802155	228.642
YFR035C	0.00820942	14.6774
YFR037C	0.0113299	44.997
YFR038W	0.0271681	233.7
YFR039C	0.0163303	79.3993
YFR040W	0.0207967	185.771
YFR041C	0.0262894	226.997
YFR042W	0.0123756	325.408
YFR043C	0.011773	190.293
YFR044C	0.00943552	69.8643
YFR045W	0.00989094	42.0286
YFR046C	0.0165905	240.304
YFR047C	0.0221443	181.054
YFR050C	0.0263982	16.0874
YFR052W	0.030448	3.44301
YFR053C	0.0565297	329.63
YFR054C	0.00418246	20.538
YFR055W	0.00481896	146.946
YFR056C	0.0159109	5.13394
YFR057W	0.0198563	9.7664
YGL001C	0.00502285	9.29971
YGL003C	0.0122818	116.542
YGL004C	0.0267356	337.188
YGL005C	0.00973417	354.913
YGL006W	0.0296065	0.473657
YGL008C	0.0382471	115.085
YGL009C	0.016228	211.433
YGL010W	0.0164575	132.527
YGL011C	0.014932	17.2231
YGL012W	0.0279442	201.634
YGL013C	0.0211036	153.149
YGL014W	0.0221092	112.73
YGL015C	0.0295295	215.399
YGL016W	0.0148721	219.406
YGL017W	0.0142106	61.568
YGL021W	0.0822454	109.097
YGL022W	0.0116093	198.847
YGL023C	0.0118564	246.027
YGL024W	0.0117167	280.843
YGL025C	0.00762298	323.378
YGL026C	0.00529978	148.211
YGL027C	0.044918	248.315
YGL028C	0.0800753	350.726
YGL029W	0.0282692	137.142
YGL030W	0.0162976	70.8425
YGL031C	0.0124256	76.3189
YGL032C	0.0501736	30.4938
YGL034C	0.0171745	76.9656
YGL035C	0.0395588	350.073
YGL037C	0.0328372	338.705
YGL038C	0.0546606	305.041
YGL040C	0.0163948	27.5075
YGL042C	0.0190479	79.9384
YGL043W	0.0135622	132.025
YGL045W	0.0126957	276.36
YGL047W	0.0379702	9.93986
YGL048C	0.0107232	64.8557
YGL049C	0.0134427	149.738
YGL050W	0.0221058	99.1605
YGL052W	0.0189498	99.3765
YGL053W	0.0400597	51.1876
YGL055W	0.0542992	355.794
YGL057C	0.0286577	326.247
YGL058W	0.00561303	16.8472
YGL059W	0.00803112	319.23
YGL060W	0.0228412	255.826
YGL061C	0.0443096	251.871
YGL062W	0.0453139	274.952
YGL063W	0.015669	299.855
YGL064C	0.00295844	229.6
YGL065C	0.0349125	208.445
YGL066W	0.00610664	286.515
YGL068W	0.0197916	99.9343
YGL069C	0.0102056	67.5594
YGL071W	0.00755883	184.732
YGL072C	0.0200463	181.774
YGL073W	0.00676593	152.168
YGL074C	0.0012088	347.904
YGL075C	0.0194894	281.957
YGL076C	0.00458131	342.883
YGL077C	0.0166234	63.0437
YGL078C	0.0142596	103.524
YGL082W	0.0147524	104.314
YGL083W	0.0257244	136.15
YGL085W	0.00589809	284.425
YGL086W	0.0212943	157.196
YGL087C	0.0147466	101.671
YGL089C	0.0161145	123.942
YGL090W	0.00489382	217.418
YGL091C	0.0154748	171.937
YGL094C	0.0349624	214.477
YGL097W	0.0262107	147.256
YGL098W	0.0120142	333.06
YGL099W	0.0226951	116.51
YGL101W	0.0345041	163.535
YGL102C	0.0147422	80.3499
YGL103W	0.0165774	7.55503
YGL106W	0.0181594	81.1015
YGL107C	0.00894063	71.3068
YGL109W	0.0110191	164.884
YGL110C	0.0155654	129.627
YGL111W	0.0260711	129.347
YGL112C	0.0202904	124.866
YGL113W	0.0763277	190.97
YGL114W	0.0206268	107.585
YGL115W	0.00787126	80.0367
YGL116W	0.0755868	71.6573
YGL117W	0.0116344	310.092
YGL119W	0.0215928	36.6652
YGL121C	0.0175351	233.395
YGL122C	0.0234252	82.5552
YGL125W	0.0156417	308.593
YGL126W	0.0125137	300.254
YGL127C	0.00799444	216.049
YGL128C	0.0160688	278.546
YGL129C	0.0114529	0.723399
YGL131C	0.0050679	126.061
YGL133W	0.00895759	181.481
YGL135W	0.0127731	36.8442
YGL137W	0.0116412	235.166
YGL138C	0.013746	110.642
YGL139W	0.0234332	128.095
YGL140C	0.0137307	86.2991
YGL141W	0.023843	15.9333
YGL143C	0.0130301	352.533
YGL144C	0.0129777	78.4801
YGL146C	0.0150425	331.353
YGL149W	0.0149328	324.218
YGL151W	0.00772711	268.54
YGL152C	0.00342667	355.671
YGL153W	0.00842777	309.61
YGL156W	0.0164886	72.5257
YGL157W	0.0298959	279.112
YGL158W	0.0111667	92.5971
YGL160W	0.0118943	73.3897
YGL161C	0.00253788	179.164
YGL162W	0.0174935	99.9844
YGL163C	0.0388711	247.403
YGL164C	0.0148664	312.058
YGL165C	0.0130335	136.048
YGL166W	0.00911065	38.8113
YGL167C	0.0199477	291.744
YGL168W	0.0087689	45.3903
YGL170C	0.0104178	116.352
YGL171W	0.0180045	134.011
YGL173C	0.0157615	64.4303
YGL174W	0.0163338	227.661
YGL175C	0.0303335	253.416
YGL178W	0.0195302	254.094
YGL179C	0.0155249	245.004
YGL180W	0.0187126	1.2762
YGL181W	0.0205848	110.222
YGL183C	0.0202576	140.328
YGL184C	0.0213582	174.803
YGL185C	0.0137381	222.092
YGL186C	0.0175454	114.319
YGL187C	0.0275992	353.588
YGL188C	0.016886	57.8981
YGL189C	0.0145574	36.6353
YGL190C	0.0115609	120.677
YGL191W	0.018718	358.918
YGL194C	0.00558578	4.67685
YGL195W	0.00528401	140.044
YGL196W	0.0072895	131.07
YGL197W	0.0066773	330.909
YGL199C	0.00360254	315.247
YGL200C	0.0256629	216.717
YGL201C	0.0371361	352.692
YGL202W	0.014048	339.564
YGL203C	0.023546	137.065
YGL205W	0.0127724	292.96
YGL207W	0.0376603	273.885
YGL208W	0.0158647	287.559
YGL209W	0.0244584	74.9626
YGL210W	0.0131993	246.76
YGL212W	0.0151411	204.509
YGL213C	0.00474461	352.905
YGL214W	0.0205807	130.919
YGL216W	0.0364081	168.19
YGL217C	0.0254449	187.823
YGL218W	0.00742339	308.708
YGL219C	0.0110967	70.7005
YGL220W	0.0143058	102.186
YGL222C	0.016728	156.984
YGL223C	0.0189428	4.58692
YGL224C	0.00170797	73.7994
YGL225W	0.0412522	207.853
YGL226C-A	0.0143531	120.313
YGL230C	0.00556281	265.838
YGL231C	0.00746206	90.3534
YGL234W	0.0197844	179.422
YGL235W	0.0105497	253.767
YGL237C	0.0104635	175.308
YGL238W	0.0210083	143.32
YGL239C	0.00606247	356.508
YGL241W	0.0336496	277.805
YGL242C	0.0258291	244.404
YGL243W	0.0122692	228.001
YGL244W	0.0124268	43.0992
YGL246C	0.00460232	9.21995
YGL248W	0.0028095	286.44
YGL249W	0.0138922	58.1485
YGL250W	0.0173911	69.8833
YGL252C	0.0141173	55.7941
YGL253W	0.0382336	239.26
YGL254W	0.0129348	226.181
YGL255W	0.00750975	66.3235
YGL256W	0.00948887	123.984
YGL257C	0.0232753	70.695
YGL258W	0.0415805	350.084
YGL259W	0.00535048	323.089
YGL260W	0.00692568	96.4676
YGL261C	0.0169863	231.994
YGR001C	0.00617787	317.103
YGR002C	0.00805582	95.0388
YGR005C	0.0107313	279.514
YGR006W	0.00256632	86.5445
YGR007W	0.0135023	115.109
YGR008C	0.0117378	359.124
YGR010W	0.0178056	288.359
YGR011W	0.0158631	166.815
YGR014W	0.0369491	228.798
YGR015C	0.0210273	262.35
YGR016W	0.00825851	219.954
YGR017W	0.00537901	164.223
YGR018C	0.00389842	52.9866
YGR021W	0.00196312	122.922
YGR023W	0.0225866	61.0324
YGR024C	0.0208524	40.6203
YGR026W	0.0153887	243.728
YGR027C	0.0237088	85.3127
YGR031W	0.0128818	331.216
YGR032W	0.0232527	198.011
YGR034W	0.00907593	69.9365
YGR035C	0.0231265	102.63
YGR036C	0.0392576	153.071
YGR037C	0.00281924	243.575
YGR039W	0.0117569	268.63
YGR040W	0.0153242	358.789
YGR041W	0.0703617	332.065
YGR042W	0.0227066	311.982
YGR043C	0.0120248	328.945
YGR044C	0.106569	344.058
YGR045C	0.0224656	306.796
YGR046W	0.000384434	125.568
YGR048W	0.0282384	6.50659
YGR049W	0.0120667	205.818
YGR052W	0.00879818	314.068
YGR053C	0.0337061	293.541
YGR054W	0.00765149	9.1633
YGR055W	0.0205017	79.7983
YGR056W	0.0151353	104.111
YGR057C	0.00191473	357.376
YGR058W	0.0110735	233.622
YGR061C	0.0104046	126.991
YGR062C	0.0314776	338.596
YGR063C	0.0263791	91.0446
YGR064W	0.00957382	33.573
YGR065C	0.0102056	42.1888
YGR066C	0.0109008	46.4273
YGR067C	0.00728373	255.255
YGR070W	0.0153737	84.9629
YGR071C	0.00752703	127.026
YGR072W	0.0241376	138.221
YGR073C	0.00960935	139.445
YGR074W	0.00951987	96.6462
YGR075C	0.0207643	90.3742
YGR076C	0.0127975	26.1015
YGR077C	0.0109749	28.2256
YGR078C	0.0106688	147.829
YGR079W	0.0248417	146.013
YGR080W	0.0317279	19.1089
YGR082W	0.00795872	1.52145
YGR084C	0.013334	338.76
YGR085C	0.0115496	61.1947
YGR086C	0.0711363	342.99
YGR087C	0.0321898	50.3205
YGR089W	0.0260027	161.391
YGR090W	0.0138966	147.246
YGR091W	0.0117	113.849
YGR092W	0.0678125	35.2069
YGR093W	0.00683529	87.6445
YGR096W	0.018378	173.116
YGR097W	0.019112	253.533
YGR098C	0.0511011	184.922
YGR099W	0.051582	194.27
YGR100W	0.0249406	12.2906
YGR102C	0.0144932	51.8459
YGR103W	0.0251646	106.851
YGR104C	0.0144832	112.459
YGR105W	0.0131838	75.2588
YGR106C	0.0129492	81.0614
YGR108W	0.0833317	108.212
YGR109C	0.103177	287.008
YGR110W	0.0253802	345.481
YGR113W	0.0287777	242.152
YGR114C	0.0535637	45.6848
YGR115C	0.0179993	260.16
YGR116W	0.015505	353.541
YGR117C	0.0180296	353.881
YGR119C	0.0212408	144.813
YGR120C	0.0130952	131.269
YGR121C	0.0152617	354.087
YGR122W	0.00992266	174.387
YGR126W	0.00719893	276.499
YGR127W	0.0156491	157.04
YGR128C	0.0143884	101.232
YGR129W	0.0203948	107.423
YGR130C	0.0170879	13.8611
YGR131W	0.00690101	156.278
YGR132C	0.0105671	319.194
YGR133W	0.0179526	157.836
YGR134W	0.0113825	92.7561
YGR136W	0.0300687	355.719
YGR137W	0.0241202	51.3627
YGR138C	0.0352923	193.95
YGR139W	0.0286958	216.832
YGR140W	0.0509219	224.243
YGR142W	0.057532	237.867
YGR143W	0.0371116	54.2412
YGR144W	0.00642974	194.867
YGR145W	0.0386935	143.223
YGR146C	0.0150969	64.9933
YGR147C	0.015242	98.3091
YGR148C	0.0176673	119.792
YGR149W	0.0137193	27.7514
YGR151C	0.0301311	251.194
YGR152C	0.075139	261.437
YGR153W	0.044989	252.576
YGR154C	0.0137734	196.655
YGR155W	0.00717237	359.26
YGR156W	0.0133518	184.483
YGR157W	0.0131473	309.43
YGR158C	0.00796021	187.025
YGR159C	0.0321014	119.169
YGR160W	0.0233537	130.487
YGR161C	0.0252506	322.635
YGR162W	0.00658419	164.994
YGR164W	0.00890953	277.987
YGR166W	0.0106624	156.322
YGR169C	0.0161826	17.3515
YGR170W	0.0138406	87.5244
YGR171C	0.0189596	29.6124
YGR173W	0.0176728	145.073
YGR175C	0.0128802	173.577
YGR176W	0.0395603	51.4978
YGR177C	0.0319721	53.9622
YGR178C	0.0129848	66.3891
YGR179C	0.0162377	207.819
YGR181W	0.00699171	32.8948
YGR182C	0.0205639	18.1344
YGR183C	0.0141586	40.8955
YGR184C	0.0113356	85.7526
YGR185C	0.00575857	28.3162
YGR187C	0.0175853	126.711
YGR188C	0.0493211	240.495
YGR189C	0.0982315	271.125
YGR190C	0.0194731	117.247
YGR191W	0.0226241	125.792
YGR192C	0.00888518	107.925
YGR193C	0.0327453	8.5701
YGR194C	0.0101955	22.4439
YGR197C	0.00777964	176.576
YGR200C	0.0166977	154.751
YGR201C	0.014682	59.6828
YGR204W	0.0256891	220.079
YGR205W	0.00566903	7.86836
YGR207C	0.00994796	113.992
YGR208W	0.0161373	183.75
YGR209C	0.0181413	147.665
YGR210C	0.0188116	119.665
YGR211W	0.0161144	176.25
YGR212W	0.0120735	53.4256
YGR213C	0.0127632	121.681
YGR215W	0.00599694	80.7664
YGR216C	0.01216	104.453
YGR217W	0.0104049	147.262
YGR219W	0.0105368	24.5216
YGR220C	0.0275908	334.333
YGR221C	0.0687939	281.011
YGR222W	0.0328276	338.606
YGR225W	0.00679525	40.7722
YGR226C	0.00646744	272.128
YGR227W	0.0176379	4.8841
YGR228W	0.00443008	287.881
YGR229C	0.0177228	257.055
YGR230W	0.0313032	44.795
YGR231C	0.0181381	41.7714
YGR233C	0.0199354	100.664
YGR234W	0.0488498	343.565
YGR235C	0.0307452	350.91
YGR237C	0.0179825	353.552
YGR238C	0.0398062	275.371
YGR239C	0.0110589	174.21
YGR240C	0.0278774	149.717
YGR242W	0.00812327	183.9
YGR243W	0.00860123	340.215
YGR244C	0.0134767	323.04
YGR245C	0.0258938	121.913
YGR246C	0.0126624	235.586
YGR247W	0.0076099	161.134
YGR248W	0.00774692	331.764
YGR249W	0.002581	217.723
YGR250C	0.0241389	328.222
YGR251W	0.00987664	87.4616
YGR253C	0.0158637	74.4905
YGR255C	0.0167849	315.694
YGR258C	0.018281	8.79322
YGR259C	0.00886002	290.731
YGR260W	0.015227	123.199
YGR261C	0.0127556	203.941
YGR262C	0.0134579	65.516
YGR263C	0.00789377	323.064
YGR265W	0.024254	322.04
YGR266W	0.0112701	62.2929
YGR268C	0.0148842	23.6908
YGR271W	0.0112463	123.883
YGR272C	0.0215441	157.918
YGR273C	0.0241416	157.267
YGR274C	0.00920099	107.564
YGR277C	0.0147659	315.789
YGR279C	0.0463913	94.6525
YGR280C	0.0297766	150.677
YGR281W	0.00936743	82.8387
YGR282C	0.0210621	177.439
YGR283C	0.0123347	120.95
YGR284C	0.0171544	65.7375
YGR285C	0.0163888	52.5154
YGR286C	0.0416865	255.826
YGR288W	0.00974422	35.6362
YGR290W	0.00906244	105.086
YGR291C	0.011922	161.611
YGR292W	0.0467741	286.658
YGR293C	0.00687094	74.5479
YGR294W	0.0160648	311.401
YGR295C	0.0270596	251.114
YGR296W	0.0665638	302.952
YHL001W	0.0246756	95.1099
YHL002W	0.00980787	331.254
YHL003C	0.0146088	164.843
YHL004W	0.0278467	344.713
YHL007C	0.0153002	163.675
YHL008C	0.0270886	66.3873
YHL010C	0.00741011	212.937
YHL011C	0.00704892	129.6
YHL012W	0.00502656	336.06
YHL014C	0.0153099	123.579
YHL015W	0.00500209	139.262
YHL019C	0.0226782	44.5315
YHL020C	0.0162971	111.137
YHL021C	0.038116	16.219
YHL022C	0.0173715	72.8582
YHL023C	0.018339	105.989
YHL024W	0.0199578	152.065
YHL025W	0.0132103	94.9632
YHL026C	0.0415719	51.0232
YHL028W	0.0573282	48.3964
YHL029C	0.0153827	59.4463
YHL030W	0.0343675	45.0233
YHL032C	0.0218021	26.8146
YHL034C	0.0152526	281.804
YHL037C	0.0105003	192.609
YHL039W	0.00561807	15.4056
YHL040C	0.0338825	96.5235
YHL044W	0.0375796	329.792
YHL046C	0.0164141	242.207
YHL047C	0.0144146	121.781
YHL048W	0.0274138	257.56
YHL049C	0.0787163	311.749
YHL050C	0.0725478	304.928
YHR001W	0.0173658	34.2557
YHR001W-A	0.0230874	19.7301
YHR004C	0.000604334	290.079
YHR005C	0.0787269	19.2387
YHR005C-A	0.0102334	126.655
YHR007C	0.0134796	105.496
YHR008C	0.013084	21.6858
YHR009C	0.00767695	93.5155
YHR014W	0.0101018	89.7986
YHR015W	0.0093969	287.444
YHR016C	0.001943	89.1865
YHR018C	0.0181802	28.2568
YHR020W	0.012752	149.052
YHR022C	0.0195503	43.3018
YHR023W	0.0602944	89.5412
YHR030C	0.0128539	9.22462
YHR032W	0.00498454	189.114
YHR033W	0.0172748	122.142
YHR035W	0.00943763	163.221
YHR036W	0.00827217	344.845
YHR037W	0.0182533	15.3211
YHR038W	0.0409411	316.094
YHR039C	0.0253184	1.6201
YHR039C-B	0.0143078	141.689
YHR040W	0.00290517	46.7534
YHR041C	0.0127683	86.4522
YHR042W	0.00609786	326.08
YHR045W	0.0205876	240.928
YHR046C	0.00886563	264.857
YHR047C	0.0181478	41.7376
YHR049C-A	0.0188892	114.773
YHR049W	0.0145976	78.5058
YHR050W	0.0194934	229.397
YHR051W	0.0185104	337.26
YHR052W	0.0164804	131.873
YHR053C	0.0196071	216.652
YHR054C	0.0102321	173.465
YHR055C	0.0174747	234.275
YHR056C	0.00815288	298.751
YHR057C	0.0116681	34.1491
YHR058C	0.0116332	310.643
YHR059W	0.00584251	326.059
YHR060W	0.00870995	51.9184
YHR061C	0.022227	215.377
YHR062C	0.0194568	156.5
YHR065C	0.0203805	140.929
YHR067W	0.00926109	314.625
YHR068W	0.0159478	106.9
YHR069C	0.0194683	143.511
YHR070W	0.00812057	113.918
YHR071W	0.0359564	234.742
YHR072W	0.0167083	88.3457
YHR073W	0.0141413	56.0329
YHR074W	0.0201614	4.631
YHR075C	0.0216415	8.34098
YHR076W	0.00999146	105.484
YHR077C	0.0189388	120.507
YHR078W	0.0111716	21.074
YHR080C	0.0253683	351.378
YHR082C	0.011553	254.87
YHR083W	0.00867717	68.8535
YHR084W	0.020067	28.6118
YHR085W	0.0189797	124.932
YHR086W	0.0288062	186.903
YHR088W	0.0181878	141.561
YHR089C	0.0277699	103.382
YHR090C	0.00418489	337.133
YHR091C	0.0203799	13.2046
YHR092C	0.0596878	344.402
[truncated: 2,776 more rows]
